# Supplementary material for: Earthquake hazard characterization by using entropy: application to northern Chilean earthquakes
Source: Copernicus journal article supplement (doi:10.5194/nhess-2023-28), 2023-02-28
Supplement: Supplementary file [file nhess-2023-28-AC3-supplement.pdf]

*The authors present an innovative relationship between the earthquake hazard and the Second Law of Thermodynamics by using the Shannon entropy,  $H$ , as a indicator of the changes in the seismic activity of a region.*

*The introduction is well structured, and it shows the evolution of the entropy concept from the very beginning to the current use in seismology as an indicator of the evolution of a system. The theoretical framework allows to understand the relationship between the entropy and the Gutenberg-Richter law although some steps should be explained better (see comments below). The methodology clearly explains how the variables needed to compute the entropy are obtained. The chosen datasets (northern Chilean seismicity) look adequate to probe the hypothesis although it should be explained better (see comments). The results are well presented and explained although some figures can be improved (see comments). The discussions are clear and meaningful.*

*The overall quality of the paper is very good, and the results can be interesting to the scientific community.*

First, we would like to thank referee number 1 for his/her valuable and constructive comments.

#### *Specific questions/issues*

*1. The authors compute in the first part of the results the entropy for the whole catalogue (all depths). However, the number of earthquakes are not equally distributed for all the different depths and the seismic activity distribution is not the same for cortical and subduction or deep earthquakes so why is the reason of computing entropy using all of them if the physics is going to be different for the three depth regions?. The authors should explain why they do this better and if the idea is to demonstrate that the catalogue has to be spitted by depth region maybe even to carry out the fast fourier transform in Figure 6 may arrive to three main frequencies associated to the different entropy behaviour in each one of the three depth regions.*

Referee number 1 is right in identifying different physical behaviours depending on the depth of the selected events. The behaviour of the shallow part of the crust (the relationship between stress, strain and fracture) is different from those occurring in the upper mantle. Our idea is to show how the methodology developed in the paper can identify large earthquakes even using the entire catalogue. This can be seen in figure 6 and it is necessary to emphasize that it is a first approximation to the study of the seismicity and the earthquake hazard characterization of the area. As can be seen in figure 6, other minor variations in entropy (concerning the Tocopilla and Iquique earthquakes) appear and this motivates us to analyse seismicity by depths as a second approximation.

To explain our approximation, we have added a new paragraph at the beginning of the Results section as referee # 1 has suggested.

*2. Additionally, in Figure 11 you compute the fast fourier transform only to the intermediate depth region. Why? You argue about the apparent periodicity of the entropic signal here but why it has to be periodic? And why only in the intermediate region? I would also see an apparent periodicity in the deep region with a period of about 1500 days. Why there is no periodicity for shallow earthquakes?. The stress loading rate is usually not uniform in time and a large earthquake may change the stress on the adjacent segment changing the seismic activity behaviour. Also the stress drop may change from event to event and the strength of the crust is not usually constant in time either. Therefore, the author should also try to address this.*

Indeed, the periodic behaviour could be in the three regions A, B and C. In fact, as referee #1 correctly points out, in region C a period of 1500 days can be appreciated, although, as the authors indicated, maybe it would be necessary a longer time series be able to conclude the existence of this periodicity (the “sample” only has 3000 days). In short, in region A there are very small and irregular periods, possibly associated with a stress-loading rate usually not uniform in time because, as is well known, the strength of the crust is not constant. What happens in the deeper regions, B and C, should be associated with the extremely complex mechanisms of subduction and slag detachment. However, the periodicity that we had better observe is that of region B and, for this reason, we have carried out the fast Fourier transform only to the intermediate depth region.

To explain better why only use the fast Fourier transform in region B, we have added a new paragraph at line 256 as referee # 1 has suggested.

*3. How the uncertainty in magnitude and epicentral and depth location is taken into consideration during the analysis? The authors should also try to explain in the detail about this uncertainty and treatment in the catalogue and in the analysis.*

IPOC catalogue used in our work is available from the important and recent paper by Sippl et al. (2018). In that work, cited in our manuscript, authors presented a regional earthquake catalogue containing 101,601 double-difference relocated earthquakes to show high-resolution seismicity images of the northern Chile subduction zone forearc. The dataset is extended to 8 years of continuous seismic waveform data using automatic event detection and phase-picking routines. The uncertainty in hypocentral location was computed by using the probabilistic routine NonLinLoc (Lomax et al., 2000); authors proved that location errors inside the network are typically small (< 5 km) and hypocentral depth errors appear to be systematically larger than horizontal location errors, although this effect is small inside the network. Following Sippl et al. (2018), local magnitudes were determined from maximum amplitudes on the horizontal components after Hutton and Boore (1987) and they retrieved a total of 1,200,404 P and 688,904 S phase picks with average uncertainties of 0.11 and 0.37 s, respectively. Definitely, IPOC catalogue is a high-quality database. All these details are included in the Sippl et al. (2018) paper and we refer to readers to that work (line 192 in our paper). In our opinion, the IPOC catalogue represented an effort to minimize sources of error. However, these data are not absolutely free of

error, which is not uniform in time or place. Our approach has been to begin with a general, kind of average approach and later illustrate differences with respect to depth, which is probably the less precise parameter since it is strongly model dependent especially for deeper seisms. The latitude and longitude coordinates are more precise for shallow earthquakes. Errors in magnitude can be of limited character only, since they handle 2 significant figures at the most. Time determination is almost error free, since it is determined from the arrival of the P waves to several stations. The kind of errors present in these problems are known and they should be bore in mind when analysing the present and other results.

Hutton, L. K., & Boore, D. M. (1987). The MI Scale in Southern California. *Bulletin Of The Seismological Society Of America*, 77(6), 2074–2094.

Lomax, A., Virieux, J., Volant, P., & Berge-thierry, C. (2000). Chapter 5 Probabilistic earthquake location in 3D and layered models. In A. Lomax, et al. (Eds.), *Advances in Seismic Event Location* (pp. 101–134). Amsterdam: Kluwer Academic Publishers.

Sipl, C., Schurr, B., Asch, G., Kummerow, J., Seismicity structure of the northern Chile forearc from >100,000 double-difference relocated hypocenters, *J. Geophys. Res. Solid Earth* 123, 4063–4087; doi: 10.1002/2017JB015384 (2018).

***Additionally, I would suggest you take into consideration the following corrections:***

***Paragraph 40. Sentence no.4. change entropy is by entropy (S) is***

Done

***Equation (1) define in paragraph 45 what l and n means (you only have done it for k and W)***

We are sorry. “l” and “n” must be joined as “ln” , the natural logarithm; we have corrected it.

***Equation (4). As in this section you are still in speaking about entropy, I would suggest saying that assuming  $k=1$  then it is possible to define the Shannon information entropy (H) combining equation (2) and (3). That will allow the reader to know exactly why  $H(p)=-I(p)$ . Can you explain why  $k=1$  is assumed? In this equation also you should explain why you have changed W to  $\Omega$  (also in equation 5) and define  $\Omega$  if it is what you want to write.***

We believe that your suggestion is right and we have rewritten the paragraph following your recommendation. Moreover, a new reference was added (e.g., Truffet, 2018) to better explain why  $k = 1$ . Finally, we have unified the symbols W and  $\Omega$ .

L. Truffet, Shannon Entropy Reinterpreted, Reports on Mathematical Physics, 81, 3, 2018, 303-319, [https://doi.org/10.1016/S0034-4877\(18\)30050-8](https://doi.org/10.1016/S0034-4877(18)30050-8).

*Equation (5) in the sentence where  $t$  is a real number called the entropic index I suggest you improve the sentence saying where  $t$  is named the entropic index and can, in principle, be any real number.*

This suggestion have been incorporated in the manuscript

*Equation (6) and (8). Sometimes you use  $x$  to represent the multiplication but others you do not use it, so I recommend removing the symbol  $x$  in all the equations.*

Of course, you are right and the "x" symbol has been removed.

*Paragraph 95. In the sentence: On the other hand, if we have  $N$  earthquakes and  $n$  denotes the number of earthquakes with magnitude  $M$  you have to say On the other hand, if we have  $N$  earthquakes and  $n$  denotes the number of earthquakes with magnitude equal to or larger than  $M$  because it is needed to match with the Gutenberg-Richter relationship where  $n$  has that meaning.*

Done.

*Page 6. First sentence. After the words the calculation of entropy I would add between brackets a reference to the equation you are going to calculate)*

Done.

*Figure 1. It would be nice if you can add to the right of this figures two histograms (one with the magnitude frequency distribution and other with the depth frequency distribution)*

Done. Figure 4 and figure 8 were added to figure 1.

*Figure 8. Add dashed lines to the figure to separate the three mentioned regions.*

Done

*Figure 10. I would remove this figure because it it the same information as in Figure 11 and Figure 11 is more illustrative than the previous one*

Done

# Earthquake hazard characterization by using entropy: application to northern Chilean earthquakes

Antonio Posadas<sup>1,2</sup>, Denisse Pasten<sup>3</sup>, Eugenio E. Vogel<sup>4,5</sup>, Gonzalo Saravia<sup>6</sup>

<sup>1</sup>Departamento de Química y Física, Universidad de Almería, 04120 Almería, Spain.

5 <sup>2</sup>Instituto Andaluz de Geofísica, Campus Universitario de Cartuja, Universidad de Granada, 18071 Granada, Spain

<sup>3</sup>Departamento de Física, Facultad de Ciencias, Universidad de Chile, Santiago, Chile

<sup>4</sup>Departamento de Ciencias Físicas, Universidad de La Frontera, Casilla 54-D, Temuco, Chile

<sup>5</sup>Center for Nanoscience and Nanotechnology (CEDENNA), Santiago, Chile

10 <sup>6</sup>Los Eucaliptus 1189, Temuco 4812537, Chile

*Correspondence to:* Antonio Posadas (aposadas@ual.es)

**Abstract.** The mechanical description of the seismic cycle has an energetic analogy in terms of statistical physics and the Second Law of Thermodynamics. In this context, an earthquake can be considered as a phase transition, where continuous reorganization of stresses and forces reflects an evolution from equilibrium to non-equilibrium states and we can use this analogy to characterize the earthquake hazard of a region. In this study, we used 8 years (2007–2014) of high-quality Integrated Plate Boundary Observatory Chile (IPOC) seismic data for >100,000 earthquakes in northern Chile to test the theory that Shannon entropy,  $H$ , is an indicator of the equilibrium state of a seismically active region. We confirmed increasing  $H$  reflects the irreversible transition of a system and is linked to the occurrence of large earthquakes. Using variation in  $H$ , we could detect major earthquakes and their foreshocks and aftershocks, including 2007  $M_W$  7.8 Tocopilla earthquake, 2014  $M_W$  8.1 Iquique earthquake, and the 2010 and 2011 Calama earthquakes ( $M_W$  6.6 and 6.8, respectively). Moreover, we identified possible periodic seismic behaviour between 80 and 160 km depth.

## 1 Introduction

30 The seismicity of a region contains abundant information that can be used, from different points of view, attempting to know when an earthquake is going to occur. In physics, Entropy is one of the most fascinating, abstract and complex concepts. The present paper shows how to use Entropy to characterize the occurrence of earthquakes, i.e. to have a characterisation of the seismic hazard in entropic terms.

35 It is well known (e.g. Nikulov, 2022) that the second law of thermodynamics postulates the existence of irreversible processes in physics: the total entropy of an isolated system can increase, but cannot decrease. Namely, only those phenomena for which the entropy of the universe increases are allowed. Thus, in seismology, it is natural to use entropy to find out future states that a region of the Earth's crust can access from its current state (Akopian, 2015).

40 The concept of entropy and its connection to the Second Law of Thermodynamics was proposed by Clausius in 1865 (Clausius, 1865) and a few years later, Boltzmann realised that entropy could be used to connect the microscopic motion of particles to the macroscopic world; in his analysis, entropy ( $S$ ) is proportional to the number of accessible micro-states of the system ( $\Omega$ ) and is expressed by the famous Boltzmann equation:

$$S = k \ln \Omega \quad (1)$$

**Comentado [b1]:** Correction #1 from referee #1

**Comentado [b2]:** Correction #2 from referee #1

45 where  $k$  is Boltzmann's constant. Ben-Naim (2020) stated that, at first glance, Boltzmann's entropy and Clausius' entropy are absolutely different; however, there is complete agreement in calculating changes in entropy using the two methods (up to a multiplicative constant). The generalization of Boltzmann's entropy for systems described by other macroscopic variables corresponded to Gibbs (Zupanovic and Domagoj, 2018) and can be written as:

$$S = -k \sum_{i=1}^{\Omega} p_i \log p_i, \quad (2)$$

where  $p_i$  is the probability of the system being in the  $i$ -th state. Shannon (1948) and Shannon and Weaver (1949) introduced Boltzmann-Gibbs's entropy concept into communication theory and defined the measure of information as:

$$I(p) = \sum_{i=1}^{\Omega} p_i \log p_i, \quad (3)$$

55 where  $p$  is the distribution of states and  $p_i$  is the relative frequency for each event  $i$ . The function  $I(p)$  is called 'Shannon information' because it is a measure of knowledge; therefore,  $-I(p)$  denotes a lack of knowledge or ignorance as Majewski (2001) has highlighted. Clearly,  $I(p)$  is always negative or zero; as such, it is possible to define the 'Shannon information entropy' ( $H$ ) as the negative information measure (Ben-Naim, 2017); that is:

$$H(p) = -I(p) = - \sum_{i=1}^{\Omega} p_i \log p_i, \quad (4)$$

**Comentado [b3]:** Correction #3 from referee #1

60 which is always positive or zero. In the last equation it has been assumed, for simplicity (Truffet, 2018), that  $k = 1$ , or equivalently, that  $H(p) = -I(p)/k$ . Some (relatively) recent research carried out in the field of information theory suggests that the above expressions can be generalised. Thus, Tsallis (1988) proposed the use of:

$$S_{\tau} = \frac{k}{\tau - 1} \left( 1 - \sum_{i=1}^{\Omega} p_i^{\tau} \right), \quad (5)$$

**Comentado [b4]:** Correction #3 from referee #1

**Comentado [b5]:** Correction #3 from referee #1

65 where  $\tau$  is called the entropic index and can, in principle, be any real number. The standard distribution that characterises Boltzmann-Gibbs statistics is a particular case of Tsallis entropy in the limit of  $\tau = 1$ . Others generalizations, such as Renyi entropy, can be found in the scientific literature (e.g. Majewski and Teisseyre, 1997).

70 From the point of view of classical thermodynamics (Varotsos *et al.*, 2011; Vargas *et al.*, 2015; Sarlis *et al.*, 2018; Vogel *et al.*, 2020; Telesca *et al.*, 2022, Varotsos *et al.*, 2022), but also statistical mechanics (Michas *et al.*, 2013; Vallianatos *et al.*, 2015; Papadakis *et al.*, 2015; Vallianatos *et al.*, 2016; Vallianatos *et al.*, 2018), variation in Entropy has been widely used in seismology as an indicator of the evolution of a system (from precursor papers such as Rundle *et al.*, 2003 or Sornette and Werner, 2009, to recent ones from Posadas *et al.*, 2022, Pasten *et al.*, 2022 or Posadas and Sotolongo, 2023).

75 In this paper, we used 8 years (2007–2014) of high-quality Integrated Plate Boundary Observatory Chile (IPOC) seismic data for >100,000 earthquakes in northern Chile to test the theory that Shannon entropy,  $H$ , is an indicator of the equilibrium state of a seismically active region. Moreover, we will rough out a thermodynamics vision of the seismic cycle to characterize the seismic hazard of the northern Chilean seismicity.

80

## 2 Methods

### 2.1 Theoretical framework

85 Let us start with a representation of the state of a given seismically active region from the distribution of earthquakes with magnitudes  $M$  associated with time  $t$ ; that is,  $P(M)$ . Thus, entropy,  $H$ , postulated by Shannon, which is associated with information flow, can be reformulated (De Santis *et al.*, 2019) as:

$$H(t) = - \int_{M_0}^{M_{max}} P(M) \cdot \log(P(M)) dM \quad (6)$$

where  $M_0$  is the threshold magnitude (i.e., the magnitude for which the seismic catalogue is complete) and  $M_{max}$  is the maximum magnitude up to which earthquakes occur. There are two restrictive conditions to solve that integral. First:

$$\int_{M_0}^{M_{max}} P(M) dM = 1 \quad (7)$$

90 The second arises from the fact that the average value of all possible magnitudes  $\bar{M}$ , in a certain period, is:

$$\bar{M} = \int_{M_0}^{M_{max}} M \cdot P(M) dM \quad (8)$$

**Comentado [b6]:** Correction #4 from referee #1

**Comentado [b7]:** Correction #5 from referee #1 and correction #1 from referee #2

**Comentado [b8]:** Correction #1 from referee #2

**Comentado [b9]:** Correction #1 from referee #2

**Comentado [b10]:** Correction #5 from referee #1 and correction #1 from referee #2

95 The Second Law of Thermodynamics requires that there exists a distribution under which  $H$  would be at its maximum value while under the two restrictive conditions; that is, the spontaneous development of the system from a state of non-equilibrium to a state of equilibrium is a process in which entropy increases and the final state of equilibrium corresponds to the maximum entropy. Thus, the problem can be solved by applying the Lagrange multiplier method; to do that, we define the lagrangian  $\mathcal{L}$  as:

$$\mathcal{L}(P(M)) = H(P(M)) - \lambda_1 \int_{M_0}^{M_{max}} P(M) dM - \lambda_2 \int_{M_0}^{M_{max}} M P(M) dM \quad (9)$$

**Comentado [b11]:** Correction #1 from referee #2

where  $\lambda_1$  and  $\lambda_2$  are Lagrange's multipliers; then, it is possible to deduce the probability density function in the form (Feng and Luo, 2009):

$$P(M) = \frac{1}{\bar{M} - M_0} \exp\left(-\frac{M - M_0}{\bar{M} - M_0}\right) \quad (10)$$

100 On the other hand, if we have  $N$  earthquakes and  $n$  denotes the number of earthquakes with magnitude equal to or larger than  $M$ :

**Comentado [b12]:** Correction #6 from referee #1

$$P(M) = \frac{n}{N} \quad (11)$$

then, we match both formulas and take logarithms to get:

$$\log n = \log\left(\frac{N}{\bar{M} - M_0}\right) + \frac{M_0 \cdot \log(e)}{\bar{M} - M_0} - \frac{\log(e)}{\bar{M} - M_0} \cdot M \quad (12)$$

But, the Gutenberg-Richter relationship (Gutenberg and Richter, 1944) states that the distribution of earthquake magnitudes follows an empirical and universal relationship:

$$\log n = a - bM \quad (13)$$

105 where  $n$  is the cumulative number of earthquakes with a magnitude equal to or larger than  $M$ , and  $a$  and  $b$  are real constants that may vary in space and time. Parameter  $a$  characterises the general level of seismicity in a given area during the study period (i.e., the higher the  $a$  value, the higher the seismicity), whereas parameter  $b$ , which is typically close to 1, describes the relative abundance of large to smaller shocks. Now, identifying  
110 terms from Eqs. 12 and 13, we obtain:



$$a = \log\left(\frac{N}{\bar{M} - M_0}\right) + \frac{M_0 \cdot \log(e)}{\bar{M} - M_0} \quad (14)$$

and

$$b = \frac{\log(e)}{\bar{M} - M_0} \quad (15)$$

Hence, the probability density function (Eq. 10) can be rewritten as:

$$P(M) = \frac{b}{\log(e)} \cdot 10^{-b(M - M_0)} \quad (16)$$

and, finally, substituting into Eq. 6, we get (De Santis *et al.*, 2011):

$$\begin{aligned} H &= - \int_{M_0}^{\infty} \frac{b \cdot 10^{-b(M - M_0)}}{\log(e)} \cdot \log\left(\frac{b \cdot 10^{-b(M - M_0)}}{\log(e)}\right) dM = \\ &= -\log(b) + \log(e \cdot \log(e)) \end{aligned} \quad (17)$$

**Comentado [b13]:** Correction #3 from referee #2

115 After computing  $b$  from the classical Utsu expression (Utsu, 1965):

$$b = \frac{\log(e)}{\bar{M} - (M_0 - \frac{\Delta M}{2})} \quad (18)$$

where  $\Delta M$  is the resolution of magnitude (usually  $\Delta M = 0.1$ ), the value of entropy can be found.

## 2.2 Methodology

120 Our analysis approach included three steps:

1. First, the value of the threshold magnitude ( $M_0$ ) is a critical choice. There are two main classes of methods to evaluate  $M_0$ : catalogue-based methods (e.g., Amorèse, 2007) and network-based methods (e.g., D'Alessandro *et al.*, 2011). We used a catalogue-based method because the necessary inputs were available from our dataset. Although some studies estimate the value of  $M_0$  by fitting the linear Gutenberg–Richter relationship to the observed frequency–magnitude distribution (the magnitude at which the lower end of the frequency–magnitude distribution departs from the Gutenberg–Richter relationship is taken as  $M_0$  (Zúñiga and Wyss, 1995)), several other methods can better determine the threshold magnitude. Catalogue-based techniques include day-to-night noise modulation

125

130 (day/night method) (Rydele and Sacks, 1989), the Entire Magnitude Range (Ogata and  
Katsura, 1993), the MAXC technique or Goodness-of-Fit Test (GFT) (Wiemer and Wyss,  
2000), b-value stability (MBS) (Cao and Gao, 2002), and median-based analysis of the  
segment slope (MBASS) (Amorèse, 2007). The MAXC technique is mainly used in  
135 applied techniques and was chosen here; however, the results do not differ significantly  
among these approaches.

2. Second, the time interval  $W$  was determined for the calculation of entropy (equation  
17), using the minimum number of earthquakes to calculate  $H$ . The time interval can be  
chosen by defining a cumulative, moving, or overlapping earthquake window. Here, the  
results are presented for a sliding window to avoid the memory effect. It turns out that the  
140 results are substantially the same regardless of the approach taken. On the whole, the final  
window size offered a reasonable compromise between resolution and smoothing. The  
width of the window was chosen by following the approach of De Santis *et al.* (2011),  
which is based on meaningful values of  $b$ . In short, 200 events is the minimum needed to  
perform a robust statistical estimation of  $b$  and  $H$ . This has been confirmed by previous  
145 statistical analyses of  $a$  and  $b$  values (Utsu, 1999). However, larger values of  $W$  can be  
adopted depending on the relative error when entropy is computed (Posadas *et al.*, 2022);  
this criterion is explained below in the Results section.

3. Finally, the entropy function was obtained for each time  $t$  following Eq. 17. By  
convention, the time attributed to each point of the analyses was the time of the last  
150 seismic event considered in each window. The occurrence of a large earthquake (or the  
accumulation of several important ones) is expected to lead the seismic system to a state  
of greater disorder. Then, any earthquake is an irreversible transition to a new state  
carrying an increase in entropy. Once the major shock is over, entropy returns to stable  
values.

155

### 3 Data: the northern Chilean seismicity

The Pacific Ring of Fire, a 40,000 km horseshoe marking the tectonic boundaries of the  
Pacific Ocean (primarily along the boundaries of the Pacific Plate), hosts 90% of Earth's  
seismic activity and 75% of the active volcanoes. Also known as the Circum-Pacific Belt,  
160 it extends from Tonga and the New Hebrides islands through Indonesia, the Philippines,  
Japan, the Kuril and the Aleutian Islands, to the western coast of North America, before  
ending in the Cordillera de los Andes of South America. Among these regions, the  
Northern Chile Forearc experiences abundant interplate and intraplate earthquakes,  
intermediate and deep earthquakes associated with subduction, and a high tsunami risk  
165 along coastal areas. Events such as 2007  $M_W$  7.8 Tocopilla earthquake (Delouis *et al.*,  
2009), 2010  $M_W$  8.8 Maule megathrust earthquake (Derode *et al.*, 2021), and 2014  
 $M_W$  8.1 Iquique earthquake (Cesca *et al.*, 2016) highlight the special relevance of this  
region. As such, monitoring seismic and volcanic activity in northern Chile using dense  
seismic networks (permanent and temporary) to create extensive high-quality seismic

Comentado [b14]: Correction #7 from referee # 1

170 catalogues is a priority. To this end, the Integrated Plate Boundary Observatory Chile  
 (IPOC), established by a network of European and South American institutions, operates  
 a wide system of instruments and projects dedicated to the study of earthquakes and  
 deformation at the continental margin of Chile (<https://www.ipoc-network.org/>). The  
 network extends from the Peru–Chile border in the north to the city of Antofagasta in the  
 175 south, and from the coast in the west to the high Andes in the east.

**Table 1.** Earthquakes with magnitudes of  $> 6.5$  in the Integrated Plate Boundary Observatory Chile (IPOC) catalogue for the period 2007 to 2014.

| Date<br>(yyyy/mm/dd) | Time     | Latitude | Longitude | Depth<br>(km) | M <sub>w</sub> | Name                                  |
|----------------------|----------|----------|-----------|---------------|----------------|---------------------------------------|
| 2007/11/14           | 15:40:50 | -22,332  | -70,044   | 49.24         | 7.8            | Tocopilla earthquake                  |
| 2007/12/16           | 08:09:13 | -23,298  | -70,379   | 64.22         | 6.9            | Aftershock of Tocopilla<br>earthquake |
| 2010/03/04           | 22:39:24 | -22,391  | -68,572   | 109.51        | 6.6            | Calama 2010 earthquake                |
| 2011/06/20           | 16:35:58 | -21,894  | -68,554   | 132.84        | 6.8            | Calama 2011 earthquake                |
| 2014/03/16           | 21:16:28 | -19,955  | -70,860   | 17.86         | 6.6            | Foreshock of Iquique<br>earthquake    |
| 2014/04/01           | 23:46:46 | -19,589  | -70,940   | 19.91         | 8.1            | Iquique earthquake                    |
| 2014/04/03           | 02:43:14 | -20,595  | -70,585   | 21.96         | 7.6            | Aftershock of Iquique<br>earthquake   |

180 In this study, we used high-quality IPOC data from 2007 to 2014 (the period for which  
 data are publicly available) to test the theory that Shannon entropy (we will use Shannon  
 entropy but whatever other such as Tsallis entropy, e.g. Vallianatos *et al.*, 2015,  
 Vallianatos *et al.*, 2018, Khordad *et al.*, 2022 or Rastegar *et al.*, 2022 could be adopted)  
 represents an indicator of the equilibrium state of a seismically active region (or seismic  
 185 system); we hypothesized that the relationship between increasing entropy and the  
 occurrence of large earthquakes reflects the irreversible transition of a system. The data  
 included records of 101,601 accurately located earthquakes within an epicentral area of  
 17°S–25°S and 66°W–72°W (Figure 1a). A comprehensive study of the dataset can be  
 found in Sippl *et al.* (2018).

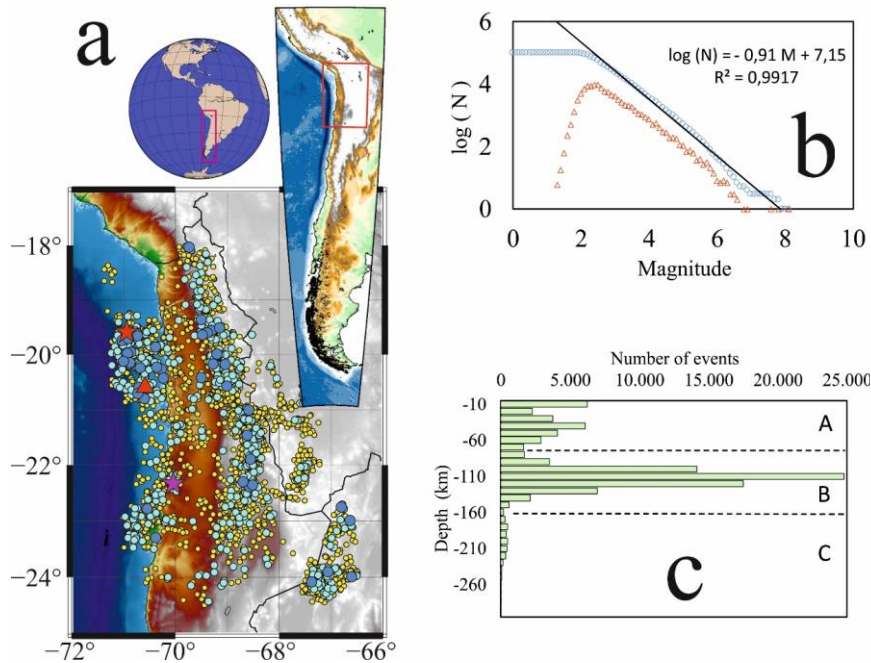

**Figure 1.** (a) Seismicity within an epicentral area of 17°S–25°S and 66°W–72°W between 2007 and 2014. Data are from the Integrated Plate Boundary Observatory Chile (IPOC) catalogue, which contains > 100,000 earthquakes; however, only events with magnitudes of > 4.0 are shown here (3,960 events in total). Circle colours denote event magnitudes: yellow = 4.0–4.9, cyan = 5.0–5.9, and blue = 6.0–6.9. Earthquakes with magnitudes of > 7.0 include 2007  $M_W$  7.8 Tocopilla earthquake (magenta star), 2014  $M_W$  8.1 Iquique earthquake (red star), and its main aftershock ( $M_W$  = 7.6, shown by the red triangle). (b) Gutenberg–Richter relationship. Blue circles denote the cumulative number of earthquakes; red triangles denote the non-cumulative number of earthquakes. Based on the maximum curvature (MAXC) technique (Wiemer and Wyss, 2000),  $M_0 = 2.2$ . (c) Histogram of earthquake depth. Bins have a 10 km resolution and three regions can be differentiated: zone A (up to 80 km depth), zone B (80–160 km depth), and zone C (> 160 km depth).

**Comentado [UdW15]:** Correction #8 and #9 from referee #1. Figure 1 include the magnitude frequency distribution (figure 4 in the original manuscript) and the depth frequency distribution (figure 8 in the original manuscript). Moreover, in figure 1c, we have added dashed lines to separate the three mentioned regions,

Correction #6 from referee #2. We show the position of the largest region on the globe. In addition, in figure 1b we show the Gutenberg-Richter relation and the associated a and b parameters.

**Comentado [UdW16]:** Question/issue #1 from referee #1

We added this paragraph to better explain our results, as Referee # 1 suggested.

190

#### 4 Results

195

Earthquakes included in the catalog have depths ranging from 0 to 300 km; It is evident that the seismic behavior of the shallower part is different from that of the deeper zone and so they should be analyzed separately. However, first, we begin with a preliminary analysis of the whole catalog to show whether the used technique could recognize earthquakes of greater magnitude. Subsequently, in a more detailed approach, a second analysis will be carried out that takes into account the depths (and, therefore, the different physical behaviors associated with seismicity in each region).

200 The seismic catalogue contains 32 earthquakes with magnitudes of 6.0 or greater, 7 of which have magnitudes of  $> 6.5$  (Table 1). The two largest earthquakes are the  $M_W$  7.8 Tocopilla earthquake (November 14, 2007) and  $M_W$  8.1 Iquique earthquake (April 1, 2014). Figure 2 shows a time series of events for earthquakes with magnitudes of  $> 4.0$ ; the number of earthquakes versus time is shown in Figure 3.

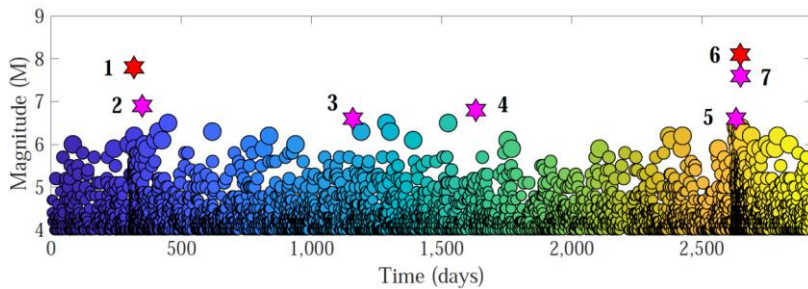

**Figure 2.** Magnitude versus time for earthquakes with magnitudes of  $> 4.0$  within an epicentral area of  $17^{\circ}\text{S}$ – $25^{\circ}\text{S}$  and  $66^{\circ}\text{W}$ – $72^{\circ}\text{W}$ . Stars correspond to the earthquakes listed in Table 1, including the (1) 2007  $M_W$  7.8 Tocopilla earthquake, (2) 2007  $M_W$  6.9 Tocopilla aftershock, (3) 2010  $M_W$  6.6 Calama earthquake, (4) 2011  $M_W$  6.8 Calama earthquake, (5)  $M_W$  6.6 foreshock of the Iquique earthquake, (6)  $M_W$  8.1 Iquique earthquake, and (7)  $M_W$  7.6 aftershock of the Iquique earthquake. Circles' size increases gradually with magnitude and colour, from blue to yellow, highlighting the temporal evolution.

205 .

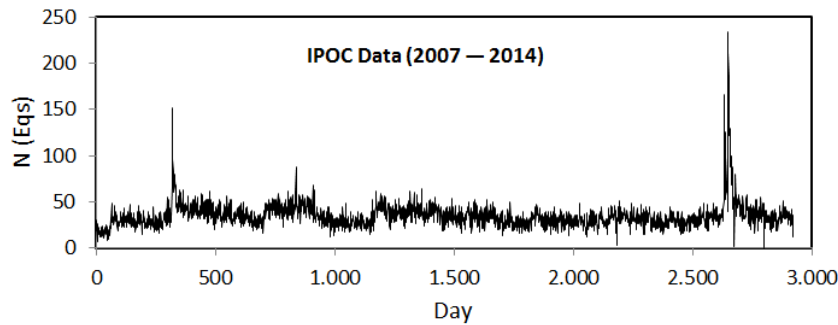

**Figure 3.** Number of daily earthquakes from 2007 to 2014 within an epicentral area of  $17^{\circ}\text{S}$ – $25^{\circ}\text{S}$  and  $66^{\circ}\text{W}$ – $72^{\circ}\text{W}$ . The seismic crises associated with the 2007  $M_W$  7.8 Tocopilla earthquake and 2014  $M_W$  8.1 Iquique earthquakes are clearly distinguished by the two prominent peaks.

**Comentado [UdW17]:** In coherence with figure 5, we remove colour scale gradient, following referee #2.

First, the threshold magnitude  $M_0$  is needed; to get it, we used the MAXC technique as we have mentioned before. Then, the Gutenberg-Richter relationship was got (Figure 1b) and a value of  $M_0 = 2.2$  is found.

210 The second step of our method is to determine the width of window  $W$  for the windowing process. Figure 4 shows the relative error of entropy versus window width. The choice of  $W$  must consider that values of  $b$  should be significant. One way to objectify this choice of  $W$  is to study the relative error when obtaining the entropy. Utsu's formalism (Utsu 1965) showed that the uncertainty associated with  $b$  value, interpreted as the error in the  
215  $b$  value determination, is given by:

$$\sigma = \frac{b}{\sqrt{N}} \quad (19)$$

From the expressions 17 and 19, it is easy to get that, for an entropy value  $H$ , the error margins are:

$$\Delta H = \log\left(\frac{b + \Delta b}{b - \Delta b}\right) \quad (20)$$

Hence, the relative error can be calculated as:

$$\varepsilon (\%) = \frac{100}{H} \cdot \log\left(\frac{b + \Delta b}{b - \Delta b}\right) \quad (21)$$

220

From Figure 4, as the window width increases, the error decreases; when the window width is 4,000 earthquakes (blue line), the error is barely 1%. Overall, the relative errors of entropy range between 0.5% and 2% for window widths of  $> 500$  cumulative earthquakes. From this point of view, the choice of  $W$  must be a reasonable compromise between calculated errors and the visibility of the results. We ultimately chose a window of  $W = 3,000$  earthquakes (yellow line), for which the relative error of entropy is close to 1% and remains practically constant.

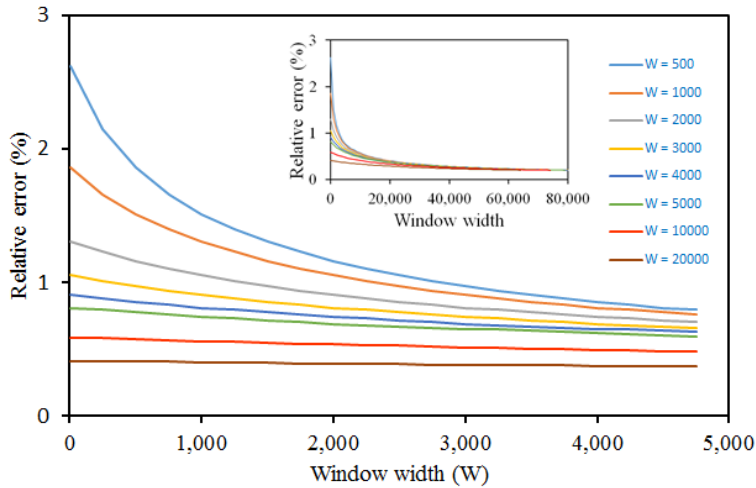

**Figure 4.** Relative error as a function of the given initial window width. For example, the cyan line corresponds to an initial window width of  $W = 500$ , for which the calculated relative error in entropy is 2.7%.

225 The threshold magnitude and width of the window for the windowing process have been set to  $M_0 = 2.2$  and  $W = 3,000$ , respectively; this reduced the size of the catalogue to 84,593 events. Finally, the third step is to get Entropy  $H$ . The evolution of entropy with time from the windowing process is shown in Figure 5. Sudden changes in entropy are evident and correspond to the times of the largest earthquakes. Levels of change in the absolute values of entropy increase with increasing earthquake magnitude. The entropy change for the Tocopilla earthquake reached  $H = 0.35$ , while for the Calama 2010 and 2011 earthquakes, it barely exceeded  $H = 0.25$ . For the Iquique earthquake and its large  
 230 foreshock and aftershock, the entropy value reached  $H = 0.45$ .

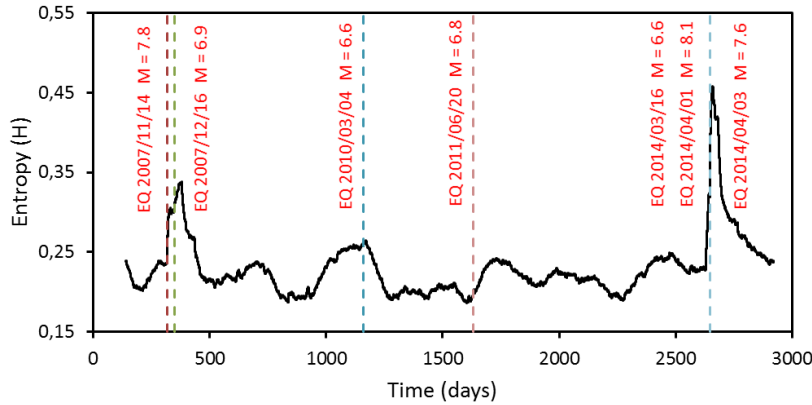

**Figure 5.** Time series of Shannon entropy,  $H$ , with the occurrence times of  $M_W > 6.5$  earthquakes shown by dashed lines (note that the large foreshock, mainshock, and large aftershock of the Iquique earthquake occurred close together in time; as such, only a single dashed line is shown). Sudden changes in entropy are clearly identifiable and coincident with large earthquakes.

**Comentado [UdW18]:** Correction #8 from referee #3. We remove colour scale gradient.

Chilean seismicity is not only shallow seismicity; in fact, deep abundant earthquakes occur as correspond to a subduction region; then, we also investigated entropy variation as a function of earthquake type, as defined by depth (Figures 1c and 6), as follows. Zone A: intraplate earthquakes characterised by shallow depth (0–80 km) and a tectonic origin. Zone B: interplate earthquakes characterised by intermediate depth (80–160 km) and related to the contact between the two plates. Zone C: slab earthquakes that occur at large depths (> 160 km) in the slab of the underlying plate.

235

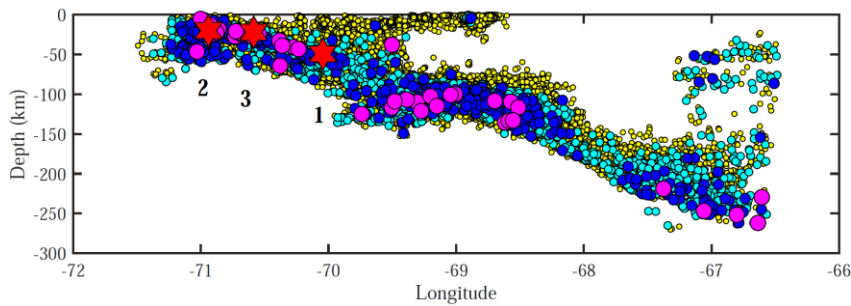

**Figure 6.** Earthquake depth versus longitude for earthquakes with magnitudes of  $> 2.0$ . Circle colours denote event magnitudes: yellow = 2.0–3.9, cyan = 4.0–4.9, blue = 5.0–5.9, and magenta = 6.0–6.9. Red stars denote earthquakes with magnitudes of  $> 7.0$ , including the (1) 2007  $M_W$  7.8 Tocopilla earthquake, (2) 2014  $M_W$  8.1 Iquique earthquake, and (3) 2014  $M_W$  7.6 aftershock of the Iquique earthquake.



240 The analysis of threshold magnitudes for zones A, B, and C, as well as the calculation of  
window  $W$  were as described above for the previous calculation of  $H$  (see Figure 7 for  
epicentral maps of the three zones and the computation of  $M_0$  in each). Figure 8 shows  
the time series of entropy for each of the three zones. In zone A, sudden changes in  
entropy were coincident with the Tocopilla and Iquique earthquakes. Zones B and C show  
low-amplitude sawtooth fluctuations in entropy (maximum  $\Delta H$  of  $\leq 0.09$  vs.  $\Delta H \approx 0.5$  in  
zone A). The entropy variations in zones B and C are negligible compared with those in  
245 zone A.

In zone B (Figure 8), the 2010 and 2011 Calama earthquakes ( $M_w$  6.6 and  $M_w$  6.8 events  
on days 1,158 and 1,631, corresponding to April 4, 2010 and June 20, 2011, respectively)  
are clearly identifiable by increases in entropy. Other peaks before and after these  
earthquakes are coincident with either smaller earthquakes or clusters of smaller  
250 earthquakes ( $M_w$  5.5–6.5), including a  $M_w$  6.5 event on March 24, 2008 (day 448); a  
group of earthquakes between December 4, 2008 and March 27, 2009 (days 703–816,  
magnitudes of 5.8–6.0), a  $M_w$  5.9 earthquake on August 8, 2012 (day 2,107); a cluster of  
earthquakes between July 10, 2013 and January 7, 2014 (days 2,382–2,563, magnitudes  
of 5.9–6.2); and, two earthquakes on March 31 and August 23, 2014, both with  
255 magnitudes of 6.2 (days 2,646 and 2,791, respectively).

**A visual analysis of figure 8 seems to indicate that there is a periodic behaviour in  
the temporal signal of entropy; Although this behaviour seems evident in zone B, it  
is not so evident in zones A and C. Zone A is associated with a stress loading rate  
usually not uniform in time because, as is well known, the strength of the crust is not  
constant; Then, change in entropy is only appreciated when the two great  
earthquakes occurred. On the other hand, zone C, where the most complex physical  
phenomena occur due to the rheological state of the materials, seems to exhibit a  
half-period in the entropic signal, but this must be confirmed in further studies with  
up-to-date data.** The apparent periodicity in zone B suggests carrying out a Fourier  
260 analysis of the entropic signal. The entropic signal is not uniformly sampled in the time  
domain; for this reason, it was averaged to the tenth part of the day and, subsequently, an  
interpolation was made for points with no sample. Thus, the resulting entropic signal was  
uniformly sampled and a fast Fourier transform was feasible.  
265

**Comentado [b19]:** Question/issue #2 from referee #1

We added this paragraph to better explain our results, as Referee # 1 suggested.

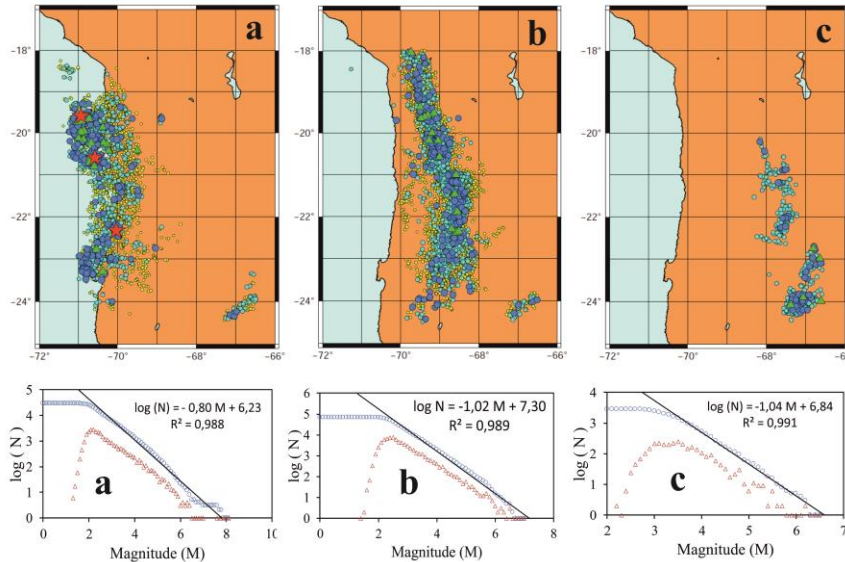

**Figure 7.** Epicentrally represented earthquake activity and non-cumulative and cumulative Gutenberg–Richter relationships in zones A–C for earthquakes with magnitudes of  $> 3.0$ . (a) Zone A (0–80 km), (b), zone C (80–160 km), and (c) zone C ( $>160$  km). Symbol colours denote earthquake magnitude: yellow circles = 3.0–3.9, cyan circles = 4.0–4.9, blue circles = 5.0–5.9, green triangles = 6.0–6.9, and red stars =  $> 7.0$ . Based on the maximum curvature (MAXC) technique (Wiemer and Wyss, 2000),  $M_0 = 2.2$  in zones A and B, and 3.2 in zone C.

**Comentado [UdW20]:** Correction #7 from referee #2. Gutenberg-Richter relation and the associated a and b parameters is shown in the figure.

270

The Fourier transform of the entropic signal (Figure 9) revealed that the peaks of the predominant amplitude have frequencies of  $0.00048$  and  $0.00119 \text{ days}^{-1}$ , corresponding to periods of  $\sim 2,100$  and 840 days, respectively. The 840-day period approximately reproduces the sequence of  $M > 5.5$  earthquakes. For instance, 840 days after the Tocopilla earthquake (November 14, 2007) was March 3, 2010, which is 1 day before the 2010 Calama 2010. However, given the relatively short period covered by the data (8 years), this Fourier analysis is necessarily preliminary. Further studies with observation periods from 2015 until the present are needed to confirm these results.

275

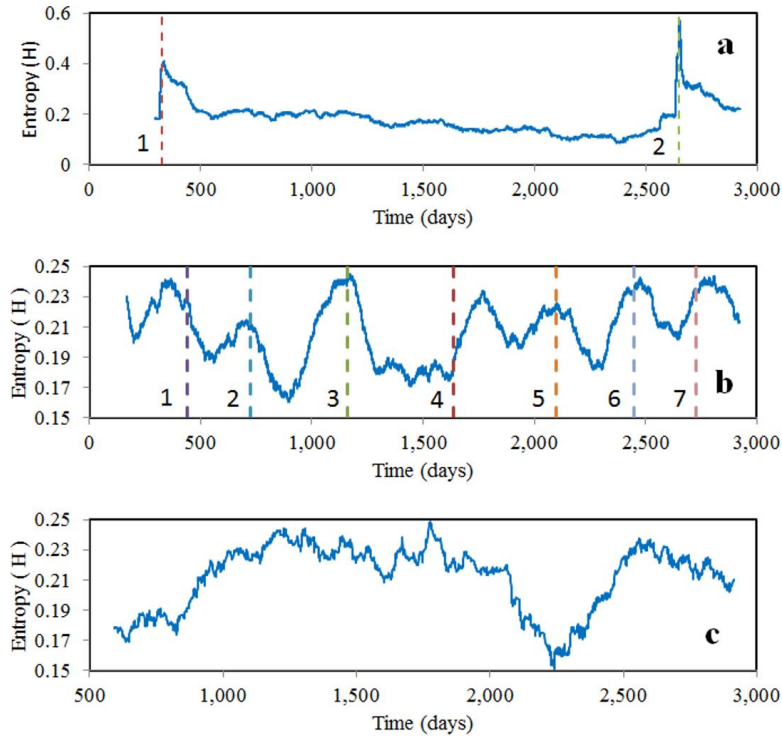

**Figure 8.** Time series of Shannon entropy,  $H$ , within different depth intervals. (a) Zone A (earthquakes with depths of 0–80 km), (b) zone B (80–160 km), and (c) zone C (> 160 km). The relative change in entropy in zone A is  $\sim 0.5$  units compared with 0.09 units in zones B and C. Lines 1 and 2 in (a) correspond to the 2007  $M_W$  7.8 Tocopilla earthquake and  $M_W$  8.1 Iquique earthquake, respectively; lines 1 to 7 in (b) correspond to the  $M_W$  6.5 March 2008 earthquake, clusters of earthquakes with magnitudes ranging from 5.8 to 6.0 from December 2008 to March 2009, the 2010  $M_W$  6.6 Calama earthquake, the 2011  $M_W$  6.8 Calama earthquake, the 2012  $M_W$  5.9 earthquake, clusters of earthquakes with magnitudes ranging from 5.9 to 6.2 from July 2013 to January 2014, and the two 2014  $M_W$  6.2 earthquakes.

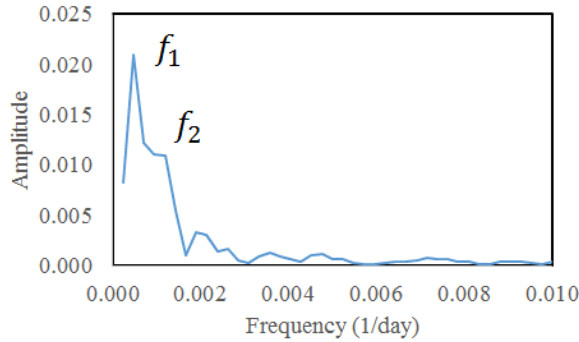

**Figure 9.** Spectrum for the entropic signal of zone B (80–160 km). The two peak amplitudes have frequencies of  $f_1 = 0.00048 \text{ day}^{-1}$  and  $f_2 = 0.00119 \text{ days}^{-1}$ , corresponding to periods of  $\sim 2,100$  and 840 days, respectively.

### 5 Discussion and conclusions

280 It is widely accepted that the seismic cycle (or “seismic system”) comprises six main stages (Figure 10) (Derode et al., 2021; Akopian and Kocharian, 2014). The stages are: (1) Over decades or years, small and medium asperities break continuously, resulting in a uniform rate of seismicity. (2) Asperities become locked, resulting in stress accumulation and decreasing seismic activity. (3) Weeks or days before a mainshock, important asperities progressively break along some sections (i.e., the foreshock stage).  
 285 (4) Over a scale of hours, accumulated stresses overcome friction and blockages in the main asperities, causing the largest magnitude earthquake of the cycle. (5) Stress relaxation occurs after the mainshock and is characterised by numerous aftershocks of smaller magnitude over several weeks or months; this ceases when new asperities become locked. (6) Finally, the system returns to the initial, long-term, state.  
 290

In this paper, we have visualized that this mechanical description of the seismic cycle has an energetic analogy in terms of statistical physics and the Second Law of Thermodynamics. As argued in detail by De Santis *et al.* (2019), an earthquake can be considered as a phase transition, where continuous reorganization of stresses and forces reflects an evolution from equilibrium to non-equilibrium states. Therefore, entropy, which measures the number of accessible states for the present conditions of the systems, can be used as an indicator of the evolution of the system (e.g., (Telesca *et al.*, 2004, Vogel *et al.*, 2020). Stages 1–3 correspond to increasing stresses and the accumulation of seismic energy. During this inter-seismic period, the magnitudes of earthquakes are relatively uniform (or ‘ordered’) and entropy is relatively low. When a large earthquake occurs (stage 4), the rupture process triggers earthquakes with magnitudes of all sizes in a chaotic way, evolving to new conditions reaching a wider range of microstates in a disordered way, and the entropy increases. Finally, during the post-seismic state (stages 5 and 6), the system progressively recovers conditions similar to the initial ones.  
 295  
 300

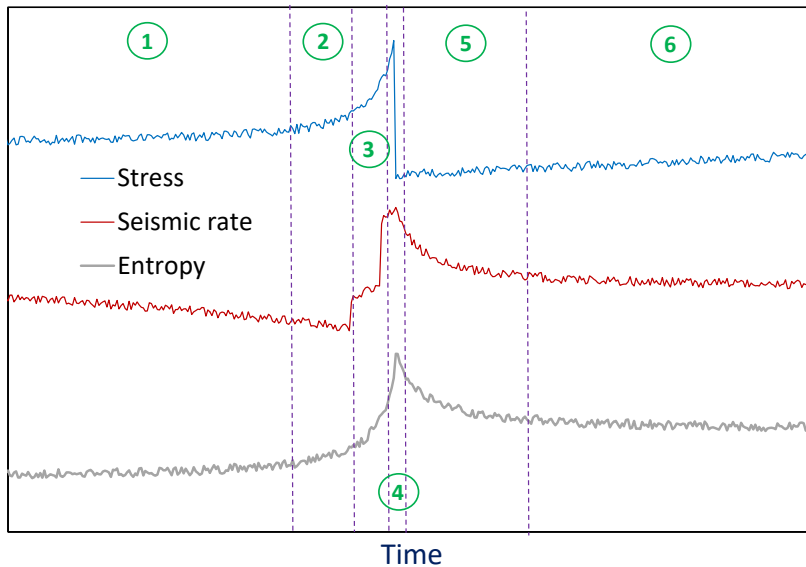

**Figure 10.** Seismic cycle from a mechanical perspective (i.e., stresses and seismic rate, which are shown in blue and red, respectively) and from a thermodynamic perspective (i.e., entropy,  $H$ , which is shown in grey). (1) Stage 1, the interseismic period, is characterised by approximately constant stress, seismic rate, and  $H$ . (2) Stage 2, the accumulation period, is characterised by modest increases in stress and  $H$ , but a modest decrease in seismic rate. (3) Stage 3, the foreshocks period, is characterised by increasing stress, seismic rate, and  $H$ . (4) Stage 4, the coseismic period, is characterised by an abrupt decrease in stress, but increases in the seismic rate and  $H$ . (5) Stage 5, the postseismic and aftershock period, is characterised by decreasing stress (i.e., relaxation), seismic rate, and  $H$  (towards the initial value). (6) Stage 6, during which the seismic cycle starts again.

305

Increasing entropy,  $H$ , from a thermodynamic perspective, is associated with an irreversible transition from one state to another on both small (Scholz, 1968) and large (e.g., Parsons *et al.*, 2008) scales. Using a high-quality catalogue of seismicity in northern Chile, made possible owing to the IPOC network, we confirmed a strong temporal correlation between entropy and the occurrence of earthquakes. Using the entropy value, we could identify all earthquakes with magnitudes of  $> 6.5$  in the catalogue. (i.e., seven events from 2007 to 2014, with magnitudes ranging from 6.6 to 8.1)

310

However, it is important to note that changes in entropy are detected by analysing the entire catalogue; that is, to detect a change in entropy associated with any event, data from both before and after the event must be analysed. At present, this limits the use of this method for seismic prediction. Further study is needed to determine a robust approach for predicting how a time series will continue without prior knowledge; that is, to determine threshold entropy values and trends that can be used to predict a significant event in the immediate future. To achieve this, an absolute scale of entropy will be necessary.

315

320 Earthquakes in zone A (0–80 km depth) tend to be tectonic in origin and have higher  
magnitudes than those in zones B and C (i.e., intermediate and deep earthquakes); as such,  
they are of most concern from a risk management perspective. Our results show that the  
entropy changes associated with such events are much stronger when only data from this  
depth interval is considered; variations are of the order of one hundredth in zones B and  
325 C, but several tenths in zone A.

*Data availability.* The data are public and available at <https://www.ipoc-network.org/data/> and in *Sippl et al. (2018)* available at <http://doi.org/10.5880/GFZ.4.1.2018.001>.

330 *Author contributions.* All authors contributed equally to the design of the methodology,  
discussion, analysis and revisions of the manuscript.

*Competing interests.* The authors declare no competing interests.

*Acknowledgements.* We would like to express our gratitude to the Integrated Plate  
Boundary Observatory Chile (IPOC) for collecting and sharing the data used in this work.

335 *Financial support.* This work was funded partially by the Spanish State Research  
Agency (SRA) under the grant PID2021-124701NB-C21 y C22., partially by the  
FEDER/UAL Project UAL2020-RNM-B1980 and also partially by the research group  
RNM104 of the Junta de Andalucía. The University of Almeria funding for open access  
charge if applicable. EEV was supported by Fondecyt (grant number 1230055) and ANID  
340 through the Center for Development of Nanoscience and Nanotechnology (CEDENNA;  
grant number AFB220001).

## References

Akopian, S. T., Open dissipative seismic systems and ensembles of strong earthquakes:  
345 Energy balance and entropy funnels, *Geophys. J. Int.* 201, 1618–1641 (2015).  
[doi.org/10.1093/gji/ggv096](https://doi.org/10.1093/gji/ggv096).

Akopian, S. Ts., Kocharian, A. N. Critical behaviour of seismic systems and dynamics in  
ensemble of strong earthquakes. *Geophys. J. Int.* 196, 580–599; [doi: 10.1093/gji/ggt398](https://doi.org/10.1093/gji/ggt398)  
(2014).

350 Amorèse, D., Applying a change-point detection method on frequency-magnitude  
distributions, *Bull. Seismol. Soc. Am.* 97, 1742–1749; [doi:10.1785/0120060181](https://doi.org/10.1785/0120060181) (2007).

Ben-Naim, A., Entropy, Shannon’s measure of information and Boltzmann’s H- theorem.  
*Entropy* 2017, 19:48. [doi: 10.3390/e19020048](https://doi.org/10.3390/e19020048).

Ben-Naim, A., Entropy and time. *Entropy* 2020, 22:430. [doi: 10.3390/e22040430](https://doi.org/10.3390/e22040430).

- 355 Cao, A. M., Gao, S. S., Temporal variations of seismic b-values beneath northeastern Japan island arc. *Geophys. Res. Lett.* 29(9), 1334; doi:10.1029/2001GL013775 (2002).
- Cesca, S., Grigoli, F., Heimann, S., Dahm, T., Kriegerowski, M., Sobiesiak, M., Tassara, C. Olcay, M., The Mw 8.1 2014 Iquique, Chile, seismic sequence: a tale of foreshocks and aftershocks, *Geophys. J. Int.*, 204, 1766–1780 (2016). doi: 10.1093/gji/ggv544.
- 360 Clausius, R., *Mechanical theory of heat*. London, UK: John van Voorst; 1865.
- D'Alessandro, A., Luzio, D., D'Anna, G. & Mangano, G., Seismic Network Evaluation through Simulation: An Application to the Italian National Seismic Network, *Bull. Seismol. Soc. Am.* 101, 1213–1232; doi: 10.1785/0120100066 (2011).
- 365 Delouis, B., Pardo, M., Legrand, D., Monfret, T., The MW 7.7 Tocopilla Earthquake of 14 November 2007 at the Southern Edge of the Northern Chile Seismic Gap: Rupture in the Deep Part of the Coupled Plate Interface, *Bull. Seismol. Soc. Am.* 99, (1) 87–94; doi:10.1785/0120080192 (2009).
- 370 Derode, B., Madariaga, R., Campos, J., Seismic rate variations prior to the 2010 Maule, Chile MW 8.8 giant megathrust earthquake, *Sci Rep* 11, 2705. doi.org/10.1038/s41598-021-82152-0 (2021).
- De Santis, A., Cianchini, G., Favali, P., Beranzoli, L. & Boschi, E., The Gutenberg-Richter Law and Entropy of Earthquakes: Two Case Studies in Central Italy, *Bull. Seism. Soc. Am.* 101, 1386–1395; doi: 10.1785/0120090390 (2011).
- 375 De Santis, A., Abbattista, C., Alfonsi, L., Amoruso, L., Campuzano, S., Carbone, M., Cesaroni, C., Cianchini, G., De Franceschi, G., De Santis, A., Di Giovambattista, R., Marchetti, D., Martino, L., Perrone, L., Piscini, A., Rainone, M., Soldani, M., Spogli, L., Santoro, F., “Geosystemics View of Earthquakes”, *Entropy* 21, 412–442 (2019). doi.org/10.3390/e21040412.
- 380 Feng, L., Luo, G., The relationship between seismic frequency and magnitude as based on the Maximum Entropy Principle, *Soft Comput*, 2009, 13:979–83. doi: 10.1007/s00500-008-0340-x.
- Gutenberg, B., and Richter, C. F., “Frequency of earthquakes in California”, *Bull. Seismol. Soc. Am.*, 34, 185–188, 1944.
- 385 Khordad, R., Rastegar Sedehi, H.R., Sharifzadeh, M., Susceptibility, entropy and specific heat of quantum rings in monolayer graphene: comparison between different entropy formalisms, *Journal of Computational Electronics* (2022) 21:422–430. doi.org/10.1007/s10825-022-01857-1.
- 390 Majewski, E., *Thermodynamics of chaos and fractals applied: evolution of the earth and phase transformations*. In: Teisseyre R, Majewski E, editors. *Earthquake thermodynamics and phase transformations in the Earth’s interior*. Academic Press, 2001, p. 25–78.

- Majewski, E., Teisseyre, R., Earthquake thermodynamics. *Tectonophysics* 1997, 277:219–33. doi: 10.1016/S0 040-1951(97)0 0 088-7.
- Michas, G., Vallianatos, F., Sammonds, P., Non-extensivity and long-range correlations in the earthquake activity at the west Corinth rift (Greece). *Nonlinear Process Geophys* 395 2013, 20:713–24. dx.doi.org/10.5194/npg-20-713-2013.
- Nikulov, A., The Law of Entropy Increase and the Meissner Effect. *Entropy* 2022, 24, 83. doi.org/10.3390/e24010083.
- Ogata, Y., Katsura, K., Analysis of temporal and spatial heterogeneity of magnitude frequency distribution inferred from earthquake catalogues, *Geophys. J. Int.* 3(113), 727–400 738; doi: 10.1111/j.1365-246X.1993.tb04663.x (1993).
- Papadakis, G., Vallianatos, F., Sammonds, P., A nonextensive statistical physics analysis of the 1995 Kobe, Japan earthquake. *Pure Appl. Geophys* 2015, 172:1923–31. dx.doi.org/10.1007/s00024-014-0876-x.
- Parsons, T., Ji, C., Kirby, E., Stress changes from the 2008 Wenchuan earthquake and increased hazard in the Sichuan basin, *Nature* 454, 509–510; doi: 10.1038/nature07177 405 (2008).
- Pasten, D., Saravia, G., Vogel, E., Posadas, A., Information theory and earthquakes: depth propagation seismicity in northern Chile. *Chaos, Solitons and Fractals. Nonlinear Science, and Nonequilibrium and Complex Phenomena.* 165, 2, 2022, 112874. 410 doi.org/10.1016/j.chaos.2022.112874.
- Posadas, A., Sotolongo-Costa, O., Non-extensive entropy and fragment–asperity interaction model for earthquakes, *Communications in Nonlinear Science and Numerical Simulation*, 117, 2023, 106906. doi.org/10.1016/j.cnsns.2022.106906.
- Posadas, A., Morales, J., Ibáñez, J., Posadas, A., Shaking earth: Non-linear seismic processes and the second law of thermodynamics: A case study from Canterbury (New Zealand) earthquakes, *Chaos, Solitons and Fractals. Nonlinear Science, and Nonequilibrium and Complex Phenomena*, 151, 2022. 415 doi.org/10.1016/j.chaos.2021.111243.
- Rastegar Sedehi, H.R., Bazrafshan, A., Khordad, R., Thermal properties of quantum rings in monolayer and bilayer graphene, *Solid State Communications*, 353 (2022) 114853. 420 doi.org/10.1016/j.ssc.2022.114853.
- Rundle, J.B., Turcotte, D.L., Shcherbakov, R., Klein, W., Sammis, C., Statistical physics approach to understanding the multiscale dynamics of earthquake fault systems. *Rev Geophys* 2003, 41:1019–49. doi:10.1029/2003RG000135.
- Rydele, P. A., Sacks, I. S., Testing the completeness of earthquake catalogs and the hypothesis of self-similarity, *Nature* 337, 251–253; doi: 10.1038/337251a0 (1989). 425



- Sarlis, N. V., Skordas, E. S., Varotsos, P. A., A remarkable change of the entropy of seismicity in natural time under time reversal before the super-giant M9 Tohoku earthquake on 11 March 2011, *Europhys. Lett.* 124, 29001–29008 (2018). doi: 10.1209/0295-5075/124/29001
- 430
- Shannon, C. E., The mathematical theory of communication, *Bell Syst. Tech. J.* 27, 379–423 (1948).
- Shannon, C. E., Weaver, W., *The Mathematical Theory of Communication* (The Board of Trustees of the University of Illinois, 1949).
- 435
- Scholz, C. H. The frequency–magnitude relation of microfracturing in rock and its relation to earthquakes. *Bull. Seismol. Soc. Am.* 58, 399–415; doi: 10.1785/BSSA0580010399 (1968).
- Sippl, C., Schurr, B., Asch, G., Kummerow, J., Seismicity structure of the northern Chile forearc from >100,000 double-difference relocated hypocenters, *J. Geophys. Res. Solid Earth* 123, 4063–4087; doi: 10.1002/2017JB015384 (2018).
- 440
- Sornette D , Werner MJ . Statistical physics approaches to seismicity. In: Mey- ers RA, editor. *Encyclopedia of complexity and systems science*. Springer; 2009. p. 7872–91. doi: 10.1007/978-0-387-30440-3\_467.
- Telesca, L., Lapenna, V. & Lovallo, M. Information entropy analysis of Umbria-Marche region (central Italy). *Nat. Hazards Earth Syst. Sci.* 4, 691–695; 10.5194/nhess-4-691-2004 (2004).
- 445
- Telesca, L., Thai, A.T., Lovallo, M., Cao, D.T., Nguyen, L.M., Shannon Entropy Analysis of Reservoir-Triggered Seismicity at Song Tranh 2 Hydropower Plant, Vietnam. *Appl. Sci.* 2022, 12, 8873. doi.org/10.3390/app12178873.
- 450
- L. Truffet, Shannon Entropy Reinterpreted, *Reports on Mathematical Physics*, 81, 3, 2018, 303-319, [https://doi.org/10.1016/S0034-4877\(18\)30050-8](https://doi.org/10.1016/S0034-4877(18)30050-8).
- Tsallis, C., Possible generalization of Boltzmann-Gibbs statistics, *J Stat Phys* 1988; 52:479. doi.org/10.1007/BF01016429 .
- 455
- Utsu, T., A method for determining the value of b in a formula  $\log N = a - bM$  showing the magnitude-frequency relation for earthquakes, *Geophys. Bull. Hokkaido Univ. Jpn.* 13, 99–103 (1965).
- Utsu T., Representation and Analysis of the Earthquake Size Distribution: A Historical Review and Some New Approaches, *Pure Appl. Geophys.* 155, 509–535; doi: 10.1007/s000240050276 (1999).
- 460
- Vallianatos, F., Michas, G., Papadakis, G., A description of seismicity based on non-extensive statistical physics: a review. In: D’Amico S, editor. *Earthquakes and their*

- impact on society. Cham: Springer Natural Hazards; 2015, p. 1–41.  
dx.doi.org/10.1007/978-3-319-21753-6.
- 465 Vallianatos, F., Papadakis, G., Michas, G., Generalized statistical mechanics approaches to earthquakes and tectonics, Proc R Soc Lond Ser A Math Phys Eng Sci 2016; 472:20160497. <http://dx.doi.org/10.1098/rspa.2016.0497>.
- Vallianatos, F., Michas, G., Papadakis, G., Nonextensive statistical seismology: An overview. In: Chelidze T, Vallianatos F, Telesca L, editors. Complexity of seismic time series. Complexity of seismic time series: Measurement and application, Elsevier; 2018, p. 25–59. dx.doi.org/10.1016/B978-0-12-813138-1.00002-X.
- 470 Vargas, C.A., Flores-Márquez, E.L., Ramírez-Rojas, A., Telesca, L., Analysis of natural time domain entropy fluctuations of synthetic seismicity generated by a simple stick–slip system with asperities, Physica A: Statistical Mechanics and its Applications, 419, 2015, 23-28. doi.org/10.1016/j.physa.2014.10.037.
- 475 Varotsos, P. A., Sarlis, N. V., and Skordas, E. S., “Scale-specific order parameter fluctuations of seismicity in natural time before mainshocks,” Europhys. Lett. 96, 59002, 2011. doi 10.1209/0295-5075/96/59002
- Varotsos, P.A.; Sarlis, N.V.; Skordas, E.S. Order Parameter and Entropy of Seismicity in Natural Time before Major Earthquakes: Recent Results. Geosciences 2022, 12, 225. doi.org/10.3390/geosciences12060225.
- 480 Vogel, E.E., Brevis, F.G., Pastén, D., Muñoz, V., Miranda, R.A., Chian, A., Measuring the seismic risk along the Nazca-South American subduction front: Shannon entropy and mutability. Nat. Hazards Earth Syst. Sci. 20, 2943–2960. doi.org/10.5194/nhess-20-2943-2020.
- 485 Wiemer, S, Wyss, M., Minimum magnitude of complete reporting in earthquake catalogs: examples from Alaska, the Western United States, and Japan, Bull. Seismol. Soc. Am. 90, 859–869; doi: 10.1785/0119990114 (2000).
- Zúñiga, F., Wyss, M., Inadvertent changes in magnitude reported in earthquake catalogs: Their evaluation through b-value estimates, Bull. Seismol. Soc. Am. 85, 1858–1866; doi:10.1785/BSSA0850061858 (1995).
- 490 Zupanovic, P., Domagoj, K., Relation between Boltzmann and Gibbs entropy and example with multinomial distribution, J. Phys. Commun. 2018, 2:045002. doi: 10.1088/2399-6528/aab7e1.
