# Supplementary material for: Earthquake hazard characterization by using entropy: application to northern Chilean earthquakes
Source: Copernicus journal article supplement (doi:10.5194/nhess-2023-28), 2023-02-28
Supplement: Supplementary file [file nhess-2023-28-AC4-supplement.pdf]

*In the paper “Earthquake hazard characterization by using entropy: application to northern Chilean earthquakes” the authors discuss a statistical physics approach for the characterization of seismicity evolution and dynamics in Northern Chile. To this end, the authors use the relationship between the Gutenberg-Richter scaling relation and the Shannon entropy to demonstrate variations in entropy associated with the occurrence of strong earthquakes in this region. The manuscript is generally well-written and organized, the methodology is sound, and the results present some interest for the scientific community. Therefore, I recommend its publication after some minor revisions listed below.*

First, we would like to thank referee number 2 for his/her valuable and constructive comments.

*1) In Equation 6 and so on, the upper limit of the integral, representing the interval of earthquake magnitudes, is infinity. However, there is a maximum magnitude up to which earthquakes occur. I would suggest substituting the infinity symbol with  $M_{max}$ .*

Thank you very much for this suggestion. Of course, it has been done.

*2) In Page 4, the annotation given first to the parameter  $n$  is “the number of earthquakes with magnitude  $M$ ”, whereas later on “the cumulative number of earthquakes with a magnitude equal to or larger than  $M$ ”. The annotation given to particular parameters should be consistent throughout the text.*

You have right and we have corrected this mistake to have coherence in the whole text.

*3) Equation 17 has also been derived by De Santis et al. (2011). Provide the appropriate references and/or discussion.*

Done. Of course, we have added De Santis et al. (2011).

*4) The authors use the MAXC method to estimate the magnitude of completeness ( $M_c$ ) of their catalog. Woessner and Wiemer (BSSA, 2005) suggested that  $M_c$  calculated with this method should be corrected to +0.2 units of magnitude to give more robust estimation of the  $b$ -value. Did the authors consider this correction?*

Referee #2 is right in his/her appreciation: it is well known that MAXC method generally underestimated  $M_c$  value. In their paper, Woessner and Wiemer (2005) state that: “The application of the EMR and MAXC approaches to the 1992 Landers aftershock sequence shows that  $M_c$  was slightly underestimated by 0.2 in Wiemer and Katsumata (1999)”. And, finally, their conclusions indicated: “...for a fast analysis of  $M_c$ , we recommend using the MAXC approach in combination with the bootstrap and add a correction value (e.g.,  $M_c = M_c(\text{MAXC}) + 0.2 M_c$ )”.

However, when the number of earthquakes to be considered is important from a statistical point of view, the best option is the MAXC technique. Thus, e.g. De Santis et al. (2011) stated that: “The choice for this value of  $M_0$  1.4 was made by inspecting the magnitude frequency and cumulative distributions

*over the period of concern to check the catalogue completeness. We recognize that this choice of  $M_0$  is a little lower than the value given for the same region by a recent evaluation of the spatio-temporal behaviour of  $M_0$  of the same catalogue over Italy. (...) The dense distribution of the more recent seismic network (...) and the careful check by the personnel dedicated to the operations of seismic event detection support the value here proposed for  $M_0$ . In addition, our choice of  $M_0$  1.4 allows us to use a greater number of events than those eventually obtained considering a greater magnitude threshold, thus improving the statistics of our analysis". ( $M_0$  in their paper refer to  $M_C$ ).*

As in the case of the De Santis et al. (2011) work, the IPOC catalogue used recordings from the IPOC seismic network (GFZ & CNRS-INSU) as well as auxiliary permanent or temporary stations that were deployed in the years 2007–2014; moreover, permanent stations from the CSN (Centro Sismológico Nacional) and GEOFON (GEOFON Data Center, 1993), WestFissure network operated by the Free University of Berlin, and the MINAS and IQ networks operated by GFZ Potsdam were used. On the other hand, scientific personnel working on the IPOC network include the GFZ German Research Centre for Geosciences, Potsdam Germany; the Centre National de la Recherche Scientifique Paris (C.N.R.S.), France; the Centro Sismológico Nacional, Chile; the Ecole Normale Supérieure, Paris, France; the Freie Universität Berlin, Germany; the GEOMAR Helmholtz Centre for Ocean Research Kiel, Germany; the Institut de Physique du Globe Paris (IPGP), France; the Pontificia Universidad Católica de Chile, Santiago, Chile; the Universidad Católica del Norte, Antofagasta, Chile and finally the Universidad de Chile, Santiago, Chile.

Although the correction of  $MC(MAX) + 0.2$  is correct, our interest in selecting the maximum possible number of earthquakes (and their high quality), led us to slightly underestimate the value of  $MC$ .

***5) As the authors discuss in Figure 9, the threshold magnitude ( $M_c$  in my previous comment) varies with depth. However, in their analysis of the entire catalog, they use a common threshold magnitude for all depth ranges. In addition, it is possible that  $M_c$  also varies with time, and it should be estimated in the temporal windows. The proper estimation of  $M_c$  (or  $M_0$ ) is crucial for the determination of the  $b$ -value (see Eq. 18).***

In spite of the possible depth and time variations of the GR parameters we have preferred to do just one consolidated analysis with richer statistics, representing an average behaviour of the distribution of the > 100,000 earthquakes included in this study.

***6) In Figure 1 show the position of the second largest region on the globe.***

Done

**7) The authors mention the Gutenberg-Richter scaling relation in Fig.4, as well as in other figures (Fig.9). However, in these figures only the cumulative and discrete frequency-magnitude distribution is shown. Show also the Gutenberg-Richter relation and the associated  $a$  and  $b$  parameters.**

Done

**8) What do the colors indicate in Fig.6?**

Usually, but it is not universal in all countries, the earthquake hazard colour code set up that “cool” colours, such as green or blue, are related with not dangerous earthquakes, whereas “hot” colour, such as orange or red, are related with earthquakes which higher magnitudes and then, the potential seismic danger is associated to them. Nevertheless, referee #2 is right and the colour could confuse the reader; therefore, we remove colour scale and now, the graph is black. For coherence, figure 3 is also redrawn in black colour.

# Earthquake hazard characterization by using entropy: application to northern Chilean earthquakes

Antonio Posadas<sup>1,2</sup>, Denisse Pasten<sup>3</sup>, Eugenio E. Vogel<sup>4,5</sup>, Gonzalo Saravia<sup>6</sup>

<sup>1</sup>Departamento de Química y Física, Universidad de Almería, 04120 Almería, Spain.

5 <sup>2</sup>Instituto Andaluz de Geofísica, Campus Universitario de Cartuja, Universidad de Granada, 18071 Granada, Spain

<sup>3</sup>Departamento de Física, Facultad de Ciencias, Universidad de Chile, Santiago, Chile

<sup>4</sup>Departamento de Ciencias Físicas, Universidad de La Frontera, Casilla 54-D, Temuco, Chile

<sup>5</sup>Center for Nanoscience and Nanotechnology (CEDENNA), Santiago, Chile

10 <sup>6</sup>Los Eucaliptus 1189, Temuco 4812537, Chile

*Correspondence to:* Antonio Posadas (aposadas@ual.es)

**Abstract.** The mechanical description of the seismic cycle has an energetic analogy in terms of statistical physics and the Second Law of Thermodynamics. In this context, an earthquake can be considered as a phase transition, where continuous reorganization of stresses and forces reflects an evolution from equilibrium to non-equilibrium states and we can use this analogy to characterize the earthquake hazard of a region. In this study, we used 8 years (2007–2014) of high-quality Integrated Plate Boundary Observatory Chile (IPOC) seismic data for >100,000 earthquakes in northern Chile to test the theory that Shannon entropy,  $H$ , is an indicator of the equilibrium state of a seismically active region. We confirmed increasing  $H$  reflects the irreversible transition of a system and is linked to the occurrence of large earthquakes. Using variation in  $H$ , we could detect major earthquakes and their foreshocks and aftershocks, including 2007  $M_W$  7.8 Tocopilla earthquake, 2014  $M_W$  8.1 Iquique earthquake, and the 2010 and 2011 Calama earthquakes ( $M_W$  6.6 and 6.8, respectively). Moreover, we identified possible periodic seismic behaviour between 80 and 160 km depth.

## 1 Introduction

30 The seismicity of a region contains abundant information that can be used, from different points of view, attempting to know when an earthquake is going to occur. In physics, Entropy is one of the most fascinating, abstract and complex concepts. The present paper shows how to use Entropy to characterize the occurrence of earthquakes, i.e. to have a characterisation of the seismic hazard in entropic terms.

35 It is well known (e.g. Nikulov, 2022) that the second law of thermodynamics postulates the existence of irreversible processes in physics: the total entropy of an isolated system can increase, but cannot decrease. Namely, only those phenomena for which the entropy of the universe increases are allowed. Thus, in seismology, it is natural to use entropy to find out future states that a region of the Earth's crust can access from its current state (Akopian, 2015).

40 The concept of entropy and its connection to the Second Law of Thermodynamics was proposed by Clausius in 1865 (Clausius, 1865) and a few years later, Boltzmann realised that entropy could be used to connect the microscopic motion of particles to the macroscopic world; in his analysis, entropy ( $S$ ) is proportional to the number of accessible micro-states of the system ( $\Omega$ ) and is expressed by the famous Boltzmann equation:

$$S = k \ln \Omega \quad (1)$$

**Comentado [b1]:** Correction #1 from referee #1

**Comentado [b2]:** Correction #2 from referee #1

45 where  $k$  is Boltzmann's constant. Ben-Naim (2020) stated that, at first glance, Boltzmann's entropy and Clausius' entropy are absolutely different; however, there is complete agreement in calculating changes in entropy using the two methods (up to a multiplicative constant). The generalization of Boltzmann's entropy for systems described by other macroscopic variables corresponded to Gibbs (Zupanovic and Domagoj, 2018) and can be written as:

$$S = -k \sum_{i=1}^{\Omega} p_i \log p_i, \quad (2)$$

where  $p_i$  is the probability of the system being in the  $i$ -th state. Shannon (1948) and Shannon and Weaver (1949) introduced Boltzmann-Gibbs's entropy concept into communication theory and defined the measure of information as:

$$I(p) = \sum_{i=1}^{\Omega} p_i \log p_i, \quad (3)$$

55 where  $p$  is the distribution of states and  $p_i$  is the relative frequency for each event  $i$ . The function  $I(p)$  is called 'Shannon information' because it is a measure of knowledge; therefore,  $-I(p)$  denotes a lack of knowledge or ignorance as Majewski (2001) has highlighted. Clearly,  $I(p)$  is always negative or zero; as such, it is possible to define the 'Shannon information entropy' ( $H$ ) as the negative information measure (Ben-Naim, 2017); that is:

$$H(p) = -I(p) = - \sum_{i=1}^{\Omega} p_i \log p_i, \quad (4)$$

**Comentado [b3]:** Correction #3 from referee #1

60 which is always positive or zero. In the last equation it has been assumed, for simplicity (Truffet, 2018), that  $k = 1$ , or equivalently, that  $H(p) = -I(p)/k$ . Some (relatively) recent research carried out in the field of information theory suggests that the above expressions can be generalised. Thus, Tsallis (1988) proposed the use of:

$$S_{\tau} = \frac{k}{\tau - 1} \left( 1 - \sum_{i=1}^{\Omega} p_i^{\tau} \right), \quad (5)$$

**Comentado [b4]:** Correction #3 from referee #1

**Comentado [b5]:** Correction #3 from referee #1

65 where  $\tau$  is called the entropic index and can, in principle, be any real number. The standard distribution that characterises Boltzmann-Gibbs statistics is a particular case of Tsallis entropy in the limit of  $\tau = 1$ . Others generalizations, such as Renyi entropy, can be found in the scientific literature (e.g. Majewski and Teisseyre, 1997).

70 From the point of view of classical thermodynamics (Varotsos *et al.*, 2011; Vargas *et al.*, 2015; Sarlis *et al.*, 2018; Vogel *et al.*, 2020; Telesca *et al.*, 2022, Varotsos *et al.*, 2022), but also statistical mechanics (Michas *et al.*, 2013; Vallianatos *et al.*, 2015; Papadakis *et al.*, 2015; Vallianatos *et al.*, 2016; Vallianatos *et al.*, 2018), variation in Entropy has been widely used in seismology as an indicator of the evolution of a system (from precursor papers such as Rundle *et al.*, 2003 or Sornette and Werner, 2009, to recent ones from Posadas *et al.*, 2022, Pasten *et al.*, 2022 or Posadas and Sotolongo, 2023).

75 In this paper, we used 8 years (2007–2014) of high-quality Integrated Plate Boundary Observatory Chile (IPOC) seismic data for >100,000 earthquakes in northern Chile to test the theory that Shannon entropy,  $H$ , is an indicator of the equilibrium state of a seismically active region. Moreover, we will rough out a thermodynamics vision of the seismic cycle to characterize the seismic hazard of the northern Chilean seismicity.

80

## 2 Methods

### 2.1 Theoretical framework

85 Let us start with a representation of the state of a given seismically active region from the distribution of earthquakes with magnitudes  $M$  associated with time  $t$ ; that is,  $P(M)$ . Thus, entropy,  $H$ , postulated by Shannon, which is associated with information flow, can be reformulated (De Santis *et al.*, 2019) as:

$$H(t) = - \int_{M_0}^{M_{max}} P(M) \cdot \log(P(M)) dM \quad (6)$$

where  $M_0$  is the threshold magnitude (i.e., the magnitude for which the seismic catalogue is complete) and  $M_{max}$  is the maximum magnitude up to which earthquakes occur. There are two restrictive conditions to solve that integral. First:

$$\int_{M_0}^{M_{max}} P(M) dM = 1 \quad (7)$$

90 The second arises from the fact that the average value of all possible magnitudes  $\bar{M}$ , in a certain period, is:

$$\bar{M} = \int_{M_0}^{M_{max}} M \cdot P(M) dM \quad (8)$$

Comentado [b6]: Correction #4 from referee #1

Comentado [b7]: Correction #5 from referee #1 and correction #1 from referee #2

Comentado [b8]: Correction #1 from referee #2

Comentado [b9]: Correction #1 from referee #2

Comentado [b10]: Correction #5 from referee #1 and correction #1 from referee #2

95 The Second Law of Thermodynamics requires that there exists a distribution under which  $H$  would be at its maximum value while under the two restrictive conditions; that is, the spontaneous development of the system from a state of non-equilibrium to a state of equilibrium is a process in which entropy increases and the final state of equilibrium corresponds to the maximum entropy. Thus, the problem can be solved by applying the Lagrange multiplier method; to do that, we define the lagrangian  $\mathcal{L}$  as:

$$\mathcal{L}(P(M)) = H(P(M)) - \lambda_1 \int_{M_0}^{M_{max}} P(M) dM - \lambda_2 \int_{M_0}^{M_{max}} M P(M) dM \quad (9)$$

**Comentado [b11]:** Correction #1 from referee #2

where  $\lambda_1$  and  $\lambda_2$  are Lagrange's multipliers; then, it is possible to deduce the probability density function in the form (Feng and Luo, 2009):

$$P(M) = \frac{1}{\bar{M} - M_0} \exp\left(-\frac{M - M_0}{\bar{M} - M_0}\right) \quad (10)$$

100 On the other hand, if we have  $N$  earthquakes and  $n$  denotes the number of earthquakes with magnitude equal to or larger than  $M$ :

**Comentado [b12]:** Correction #6 from referee #1

$$P(M) = \frac{n}{N} \quad (11)$$

then, we match both formulas and take logarithms to get:

$$\log n = \log\left(\frac{N}{\bar{M} - M_0}\right) + \frac{M_0 \cdot \log(e)}{\bar{M} - M_0} - \frac{\log(e)}{\bar{M} - M_0} \cdot M \quad (12)$$

But, the Gutenberg-Richter relationship (Gutenberg and Richter, 1944) states that the distribution of earthquake magnitudes follows an empirical and universal relationship:

$$\log n = a - bM \quad (13)$$

105 where  $n$  is the cumulative number of earthquakes with a magnitude equal to or larger than  $M$ , and  $a$  and  $b$  are real constants that may vary in space and time. Parameter  $a$  characterises the general level of seismicity in a given area during the study period (i.e., the higher the  $a$  value, the higher the seismicity), whereas parameter  $b$ , which is typically close to 1, describes the relative abundance of large to smaller shocks. Now, identifying  
110 terms from Eqs. 12 and 13, we obtain:

$$a = \log\left(\frac{N}{\bar{M} - M_0}\right) + \frac{M_0 \cdot \log(e)}{\bar{M} - M_0} \quad (14)$$

and

$$b = \frac{\log(e)}{\bar{M} - M_0} \quad (15)$$

Hence, the probability density function (Eq. 10) can be rewritten as:

$$P(M) = \frac{b}{\log(e)} \cdot 10^{-b(M - M_0)} \quad (16)$$

and, finally, substituting into Eq. 6, we get (De Santis *et al.*, 2011):

$$\begin{aligned} H &= - \int_{M_0}^{\infty} \frac{b \cdot 10^{-b(M - M_0)}}{\log(e)} \cdot \log\left(\frac{b \cdot 10^{-b(M - M_0)}}{\log(e)}\right) dM = \\ &= -\log(b) + \log(e \cdot \log(e)) \end{aligned} \quad (17)$$

**Comentado [b13]:** Correction #3 from referee #2

115 After computing  $b$  from the classical Utsu expression (Utsu, 1965):

$$b = \frac{\log(e)}{\bar{M} - (M_0 - \frac{\Delta M}{2})} \quad (18)$$

where  $\Delta M$  is the resolution of magnitude (usually  $\Delta M = 0.1$ ), the value of entropy can be found.

## 2.2 Methodology

120 Our analysis approach included three steps:

1. First, the value of the threshold magnitude ( $M_0$ ) is a critical choice. There are two main classes of methods to evaluate  $M_0$ : catalogue-based methods (e.g., Amorèse, 2007) and network-based methods (e.g., D'Alessandro *et al.*, 2011). We used a catalogue-based method because the necessary inputs were available from our dataset. Although some studies estimate the value of  $M_0$  by fitting the linear Gutenberg–Richter relationship to the observed frequency–magnitude distribution (the magnitude at which the lower end of the frequency–magnitude distribution departs from the Gutenberg–Richter relationship is taken as  $M_0$  (Zúñiga and Wyss, 1995)), several other methods can better determine the threshold magnitude. Catalogue-based techniques include day-to-night noise modulation



130 (day/night method) (Rydele and Sacks, 1989), the Entire Magnitude Range (Ogata and  
Katsura, 1993), the MAXC technique or Goodness-of-Fit Test (GFT) (Wiemer and Wyss,  
2000), b-value stability (MBS) (Cao and Gao, 2002), and median-based analysis of the  
segment slope (MBASS) (Amorèse, 2007). The MAXC technique is mainly used in  
135 applied techniques and was chosen here; however, the results do not differ significantly  
among these approaches.

2. Second, the time interval  $W$  was determined for the calculation of entropy (equation  
17), using the minimum number of earthquakes to calculate  $H$ . The time interval can be  
chosen by defining a cumulative, moving, or overlapping earthquake window. Here, the  
results are presented for a sliding window to avoid the memory effect. It turns out that the  
140 results are substantially the same regardless of the approach taken. On the whole, the final  
window size offered a reasonable compromise between resolution and smoothing. The  
width of the window was chosen by following the approach of De Santis *et al.* (2011),  
which is based on meaningful values of  $b$ . In short, 200 events is the minimum needed to  
perform a robust statistical estimation of  $b$  and  $H$ . This has been confirmed by previous  
145 statistical analyses of  $a$  and  $b$  values (Utsu, 1999). However, larger values of  $W$  can be  
adopted depending on the relative error when entropy is computed (Posadas *et al.*, 2022);  
this criterion is explained below in the Results section.

3. Finally, the entropy function was obtained for each time  $t$  following Eq. 17. By  
convention, the time attributed to each point of the analyses was the time of the last  
150 seismic event considered in each window. The occurrence of a large earthquake (or the  
accumulation of several important ones) is expected to lead the seismic system to a state  
of greater disorder. Then, any earthquake is an irreversible transition to a new state  
carrying an increase in entropy. Once the major shock is over, entropy returns to stable  
values.

155

### 3 Data: the northern Chilean seismicity

The Pacific Ring of Fire, a 40,000 km horseshoe marking the tectonic boundaries of the  
Pacific Ocean (primarily along the boundaries of the Pacific Plate), hosts 90% of Earth's  
seismic activity and 75% of the active volcanoes. Also known as the Circum-Pacific Belt,  
160 it extends from Tonga and the New Hebrides islands through Indonesia, the Philippines,  
Japan, the Kuril and the Aleutian Islands, to the western coast of North America, before  
ending in the Cordillera de los Andes of South America. Among these regions, the  
Northern Chile Forearc experiences abundant interplate and intraplate earthquakes,  
intermediate and deep earthquakes associated with subduction, and a high tsunami risk  
165 along coastal areas. Events such as 2007  $M_W$  7.8 Tocopilla earthquake (Delouis *et al.*,  
2009), 2010  $M_W$  8.8 Maule megathrust earthquake (Derode *et al.*, 2021), and 2014  
 $M_W$  8.1 Iquique earthquake (Cesca *et al.*, 2016) highlight the special relevance of this  
region. As such, monitoring seismic and volcanic activity in northern Chile using dense  
seismic networks (permanent and temporary) to create extensive high-quality seismic

Comentado [b14]: Correction #7 from referee # 1

170 catalogues is a priority. To this end, the Integrated Plate Boundary Observatory Chile  
 (IPOC), established by a network of European and South American institutions, operates  
 a wide system of instruments and projects dedicated to the study of earthquakes and  
 deformation at the continental margin of Chile (<https://www.ipoc-network.org/>). The  
 network extends from the Peru–Chile border in the north to the city of Antofagasta in the  
 175 south, and from the coast in the west to the high Andes in the east.

**Table 1.** Earthquakes with magnitudes of  $> 6.5$  in the Integrated Plate Boundary Observatory Chile (IPOC) catalogue for the period 2007 to 2014.

| Date<br>(yyyy/mm/dd) | Time     | Latitude | Longitude | Depth<br>(km) | M <sub>w</sub> | Name                                  |
|----------------------|----------|----------|-----------|---------------|----------------|---------------------------------------|
| 2007/11/14           | 15:40:50 | -22,332  | -70,044   | 49.24         | 7.8            | Tocopilla earthquake                  |
| 2007/12/16           | 08:09:13 | -23,298  | -70,379   | 64.22         | 6.9            | Aftershock of Tocopilla<br>earthquake |
| 2010/03/04           | 22:39:24 | -22,391  | -68,572   | 109.51        | 6.6            | Calama 2010 earthquake                |
| 2011/06/20           | 16:35:58 | -21,894  | -68,554   | 132.84        | 6.8            | Calama 2011 earthquake                |
| 2014/03/16           | 21:16:28 | -19,955  | -70,860   | 17.86         | 6.6            | Foreshock of Iquique<br>earthquake    |
| 2014/04/01           | 23:46:46 | -19,589  | -70,940   | 19.91         | 8.1            | Iquique earthquake                    |
| 2014/04/03           | 02:43:14 | -20,595  | -70,585   | 21.96         | 7.6            | Aftershock of Iquique<br>earthquake   |

180 In this study, we used high-quality IPOC data from 2007 to 2014 (the period for which  
 data are publicly available) to test the theory that Shannon entropy (we will use Shannon  
 entropy but whatever other such as Tsallis entropy, e.g. Vallianatos *et al.*, 2015,  
 Vallianatos *et al.*, 2018, Khordad *et al.*, 2022 or Rastegar *et al.*, 2022 could be adopted)  
 represents an indicator of the equilibrium state of a seismically active region (or seismic  
 185 system); we hypothesized that the relationship between increasing entropy and the  
 occurrence of large earthquakes reflects the irreversible transition of a system. The data  
 included records of 101,601 accurately located earthquakes within an epicentral area of  
 17°S–25°S and 66°W–72°W (Figure 1a). A comprehensive study of the dataset can be  
 found in Sippl *et al.* (2018).

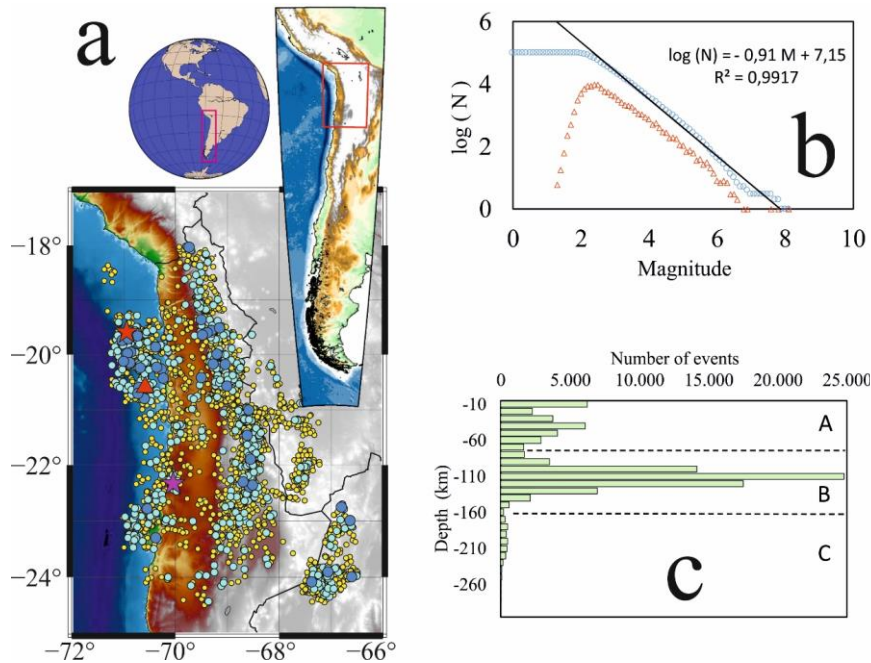

**Figure 1.** (a) Seismicity within an epicentral area of 17°S–25°S and 66°W–72°W between 2007 and 2014. Data are from the Integrated Plate Boundary Observatory Chile (IPOC) catalogue, which contains > 100,000 earthquakes; however, only events with magnitudes of > 4.0 are shown here (3,960 events in total). Circle colours denote event magnitudes: yellow = 4.0–4.9, cyan = 5.0–5.9, and blue = 6.0–6.9. Earthquakes with magnitudes of > 7.0 include 2007  $M_W$  7.8 Tocopilla earthquake (magenta star), 2014  $M_W$  8.1 Iquique earthquake (red star), and its main aftershock ( $M_W$  = 7.6, shown by the red triangle). (b) Gutenberg–Richter relationship. Blue circles denote the cumulative number of earthquakes; red triangles denote the non-cumulative number of earthquakes. Based on the maximum curvature (MAXC) technique (Wiemer and Wyss, 2000),  $M_0 = 2.2$ . (c) Histogram of earthquake depth. Bins have a 10 km resolution and three regions can be differentiated: zone A (up to 80 km depth), zone B (80–160 km depth), and zone C (> 160 km depth).

**Comentado [UdW15]:** Correction #8 and #9 from referee #1. Figure 1 include the magnitude frequency distribution (figure 4 in the original manuscript) and the depth frequency distribution (figure 8 in the original manuscript). Moreover, in figure 1c, we have added dashed lines to separate the three mentioned regions,

Correction #6 from referee #2. We show the position of the largest region on the globe. In addition, in figure 1b we show the Gutenberg-Richter relation and the associated a and b parameters.

**Comentado [UdW16]:** Question/issue #1 from referee #1

We added this paragraph to better explain our results, as Referee # 1 suggested.

190

#### 4 Results

195

Earthquakes included in the catalog have depths ranging from 0 to 300 km; It is evident that the seismic behavior of the shallower part is different from that of the deeper zone and so they should be analyzed separately. However, first, we begin with a preliminary analysis of the whole catalog to show whether the used technique could recognize earthquakes of greater magnitude. Subsequently, in a more detailed approach, a second analysis will be carried out that takes into account the depths (and, therefore, the different physical behaviors associated with seismicity in each region).

200 The seismic catalogue contains 32 earthquakes with magnitudes of 6.0 or greater, 7 of which have magnitudes of  $> 6.5$  (Table 1). The two largest earthquakes are the  $M_W$  7.8 Tocopilla earthquake (November 14, 2007) and  $M_W$  8.1 Iquique earthquake (April 1, 2014). Figure 2 shows a time series of events for earthquakes with magnitudes of  $> 4.0$ ; the number of earthquakes versus time is shown in Figure 3.

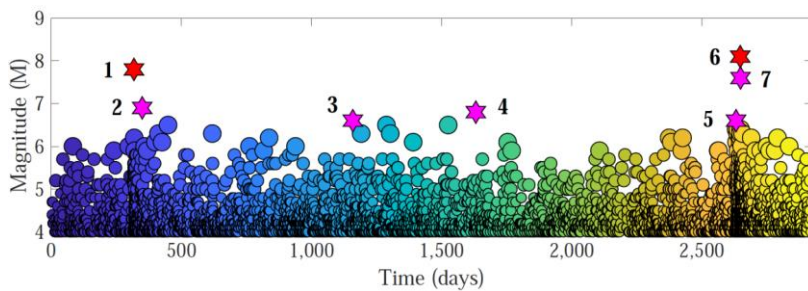

**Figure 2.** Magnitude versus time for earthquakes with magnitudes of  $> 4.0$  within an epicentral area of  $17^{\circ}\text{S}$ – $25^{\circ}\text{S}$  and  $66^{\circ}\text{W}$ – $72^{\circ}\text{W}$ . Stars correspond to the earthquakes listed in Table 1, including the (1) 2007  $M_W$  7.8 Tocopilla earthquake, (2) 2007  $M_W$  6.9 Tocopilla aftershock, (3) 2010  $M_W$  6.6 Calama earthquake, (4) 2011  $M_W$  6.8 Calama earthquake, (5)  $M_W$  6.6 foreshock of the Iquique earthquake, (6)  $M_W$  8.1 Iquique earthquake, and (7)  $M_W$  7.6 aftershock of the Iquique earthquake. Circles' size increases gradually with magnitude and colour, from blue to yellow, highlighting the temporal evolution.

205 .

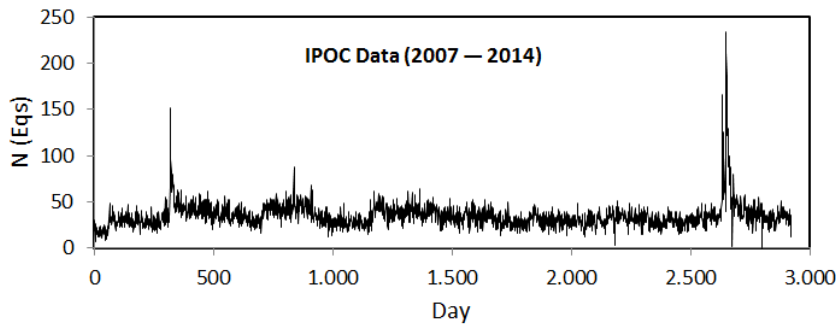

**Figure 3.** Number of daily earthquakes from 2007 to 2014 within an epicentral area of  $17^{\circ}\text{S}$ – $25^{\circ}\text{S}$  and  $66^{\circ}\text{W}$ – $72^{\circ}\text{W}$ . The seismic crises associated with the 2007  $M_W$  7.8 Tocopilla earthquake and 2014  $M_W$  8.1 Iquique earthquakes are clearly distinguished by the two prominent peaks.

**Comentado [UdW17]:** In coherence with figure 5, we remove colour scale gradient, following referee #2.

First, the threshold magnitude  $M_0$  is needed; to get it, we used the MAXC technique as we have mentioned before. Then, the Gutenberg-Richter relationship was got (Figure 1b) and a value of  $M_0 = 2.2$  is found.

210 The second step of our method is to determine the width of window  $W$  for the windowing process. Figure 4 shows the relative error of entropy versus window width. The choice of  $W$  must consider that values of  $b$  should be significant. One way to objectify this choice of  $W$  is to study the relative error when obtaining the entropy. Utsu's formalism (Utsu 1965) showed that the uncertainty associated with  $b$  value, interpreted as the error in the  
215  $b$  value determination, is given by:

$$\sigma = \frac{b}{\sqrt{N}} \quad (19)$$

From the expressions 17 and 19, it is easy to get that, for an entropy value  $H$ , the error margins are:

$$\Delta H = \log\left(\frac{b + \Delta b}{b - \Delta b}\right) \quad (20)$$

Hence, the relative error can be calculated as:

$$\varepsilon (\%) = \frac{100}{H} \cdot \log\left(\frac{b + \Delta b}{b - \Delta b}\right) \quad (21)$$

220

From Figure 4, as the window width increases, the error decreases; when the window width is 4,000 earthquakes (blue line), the error is barely 1%. Overall, the relative errors of entropy range between 0.5% and 2% for window widths of  $> 500$  cumulative earthquakes. From this point of view, the choice of  $W$  must be a reasonable compromise between calculated errors and the visibility of the results. We ultimately chose a window of  $W = 3,000$  earthquakes (yellow line), for which the relative error of entropy is close to 1% and remains practically constant.

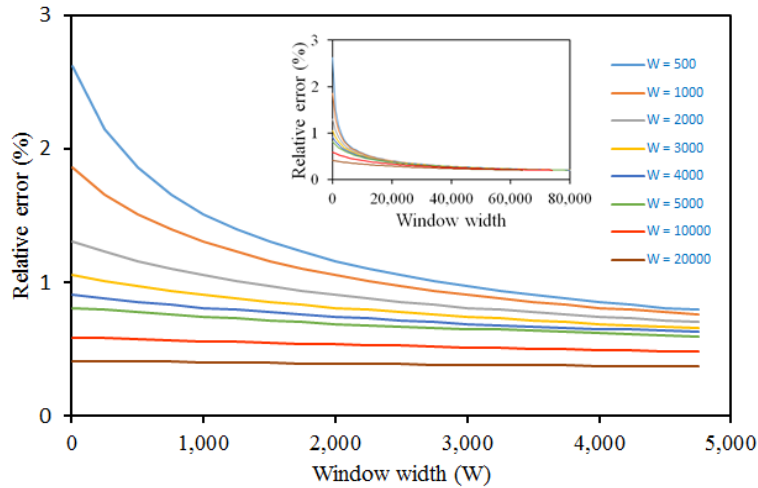

**Figure 4.** Relative error as a function of the given initial window width. For example, the cyan line corresponds to an initial window width of  $W = 500$ , for which the calculated relative error in entropy is 2.7%.

225 The threshold magnitude and width of the window for the windowing process have been set to  $M_0 = 2.2$  and  $W = 3,000$ , respectively; this reduced the size of the catalogue to 84,593 events. Finally, the third step is to get Entropy  $H$ . The evolution of entropy with time from the windowing process is shown in Figure 5. Sudden changes in entropy are evident and correspond to the times of the largest earthquakes. Levels of change in the absolute values of entropy increase with increasing earthquake magnitude. The entropy change for the Tocopilla earthquake reached  $H = 0.35$ , while for the Calama 2010 and 2011 earthquakes, it barely exceeded  $H = 0.25$ . For the Iquique earthquake and its large  
 230 foreshock and aftershock, the entropy value reached  $H = 0.45$ .

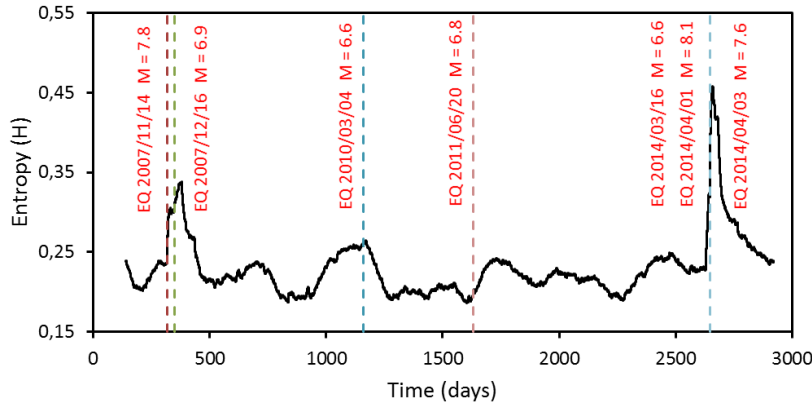

**Figure 5.** Time series of Shannon entropy,  $H$ , with the occurrence times of  $M_W > 6.5$  earthquakes shown by dashed lines (note that the large foreshock, mainshock, and large aftershock of the Iquique earthquake occurred close together in time; as such, only a single dashed line is shown). Sudden changes in entropy are clearly identifiable and coincident with large earthquakes.

**Comentado [UdW18]:** Correction #8 from referee #3. We remove colour scale gradient.

Chilean seismicity is not only shallow seismicity; in fact, deep abundant earthquakes occur as correspond to a subduction region; then, we also investigated entropy variation as a function of earthquake type, as defined by depth (Figures 1c and 6), as follows. Zone A: intraplate earthquakes characterised by shallow depth (0–80 km) and a tectonic origin. Zone B: interplate earthquakes characterised by intermediate depth (80–160 km) and related to the contact between the two plates. Zone C: slab earthquakes that occur at large depths (> 160 km) in the slab of the underlying plate.

235

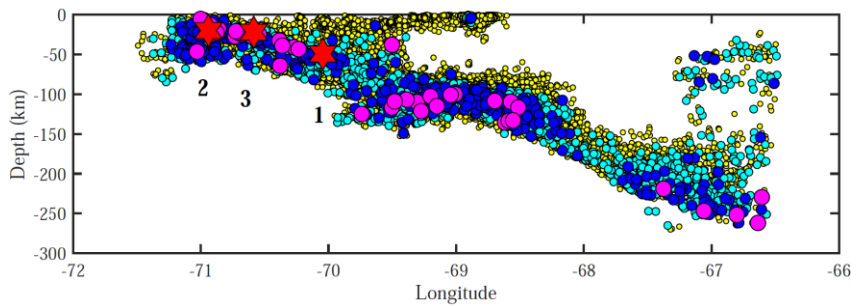

**Figure 6.** Earthquake depth versus longitude for earthquakes with magnitudes of  $> 2.0$ . Circle colours denote event magnitudes: yellow = 2.0–3.9, cyan = 4.0–4.9, blue = 5.0–5.9, and magenta = 6.0–6.9. Red stars denote earthquakes with magnitudes of  $> 7.0$ , including the (1) 2007  $M_W$  7.8 Tocopilla earthquake, (2) 2014  $M_W$  8.1 Iquique earthquake, and (3) 2014  $M_W$  7.6 aftershock of the Iquique earthquake.

240 The analysis of threshold magnitudes for zones A, B, and C, as well as the calculation of  
window  $W$  were as described above for the previous calculation of  $H$  (see Figure 7 for  
epicentral maps of the three zones and the computation of  $M_0$  in each). Figure 8 shows  
the time series of entropy for each of the three zones. In zone A, sudden changes in  
entropy were coincident with the Tocopilla and Iquique earthquakes. Zones B and C show  
low-amplitude sawtooth fluctuations in entropy (maximum  $\Delta H$  of  $\leq 0.09$  vs.  $\Delta H \approx 0.5$  in  
zone A). The entropy variations in zones B and C are negligible compared with those in  
245 zone A.

In zone B (Figure 8), the 2010 and 2011 Calama earthquakes ( $M_w$  6.6 and  $M_w$  6.8 events  
on days 1,158 and 1,631, corresponding to April 4, 2010 and June 20, 2011, respectively)  
are clearly identifiable by increases in entropy. Other peaks before and after these  
earthquakes are coincident with either smaller earthquakes or clusters of smaller  
250 earthquakes ( $M_w$  5.5–6.5), including a  $M_w$  6.5 event on March 24, 2008 (day 448); a  
group of earthquakes between December 4, 2008 and March 27, 2009 (days 703–816,  
magnitudes of 5.8–6.0), a  $M_w$  5.9 earthquake on August 8, 2012 (day 2,107); a cluster of  
earthquakes between July 10, 2013 and January 7, 2014 (days 2,382–2,563, magnitudes  
of 5.9–6.2); and, two earthquakes on March 31 and August 23, 2014, both with  
255 magnitudes of 6.2 (days 2,646 and 2,791, respectively).

**A visual analysis of figure 8 seems to indicate that there is a periodic behaviour in  
the temporal signal of entropy; Although this behaviour seems evident in zone B, it  
is not so evident in zones A and C. Zone A is associated with a stress loading rate  
usually not uniform in time because, as is well known, the strength of the crust is not  
constant; Then, change in entropy is only appreciated when the two great  
260 earthquakes occurred. On the other hand, zone C, where the most complex physical  
phenomena occur due to the rheological state of the materials, seems to exhibit a  
half-period in the entropic signal, but this must be confirmed in further studies with  
up-to-date data.** The apparent periodicity in zone B suggests carrying out a Fourier  
265 analysis of the entropic signal. The entropic signal is not uniformly sampled in the time  
domain; for this reason, it was averaged to the tenth part of the day and, subsequently, an  
interpolation was made for points with no sample. Thus, the resulting entropic signal was  
uniformly sampled and a fast Fourier transform was feasible.

**Comentado [b19]:** Question/issue #2 from referee #1

We added this paragraph to better explain our results, as Referee # 1 suggested.



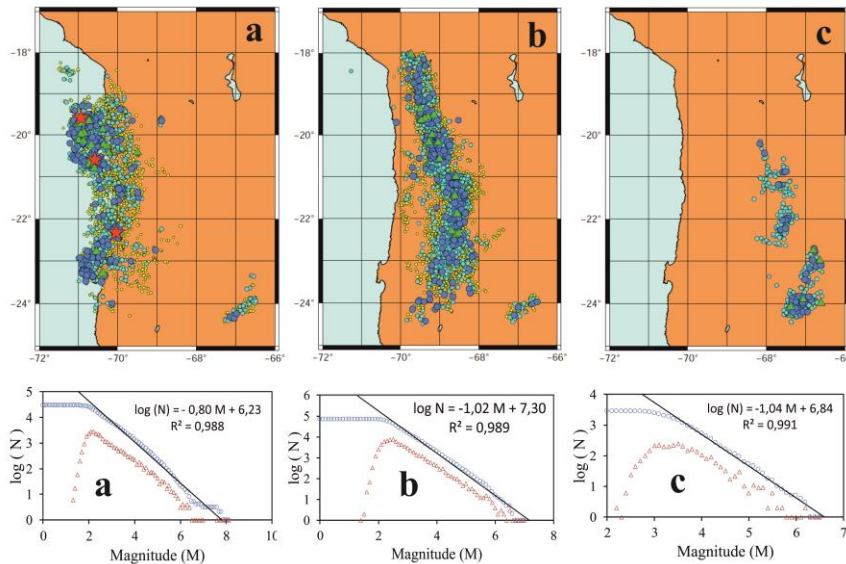

**Figure 7.** Epicentrally represented earthquake activity and non-cumulative and cumulative Gutenberg–Richter relationships in zones A–C for earthquakes with magnitudes of > 3.0. (a) Zone A (0–80 km), (b), zone C (80–160 km), and (c) zone C (>160 km). Symbol colours denote earthquake magnitude: yellow circles = 3.0–3.9, cyan circles = 4.0–4.9, blue circles = 5.0–5.9, green triangles = 6.0–6.9, and red stars = > 7.0. Based on the maximum curvature (MAXC) technique (Wiemer and Wyss, 2000),  $M_0 = 2.2$  in zones A and B, and 3.2 in zone C.

**Comentado [UdW20]:** Correction #7 from referee #2. Gutenberg-Richter relation and the associated a and b parameters is shown in the figure.

270

The Fourier transform of the entropic signal (Figure 9) revealed that the peaks of the predominant amplitude have frequencies of  $0.00048$  and  $0.00119 \text{ days}^{-1}$ , corresponding to periods of  $\sim 2,100$  and  $840$  days, respectively. The 840-day period approximately reproduces the sequence of  $M > 5.5$  earthquakes. For instance, 840 days after the Tocopilla earthquake (November 14, 2007) was March 3, 2010, which is 1 day before the 2010 Calama 2010. However, given the relatively short period covered by the data (8 years), this Fourier analysis is necessarily preliminary. Further studies with observation periods from 2015 until the present are needed to confirm these results.

275

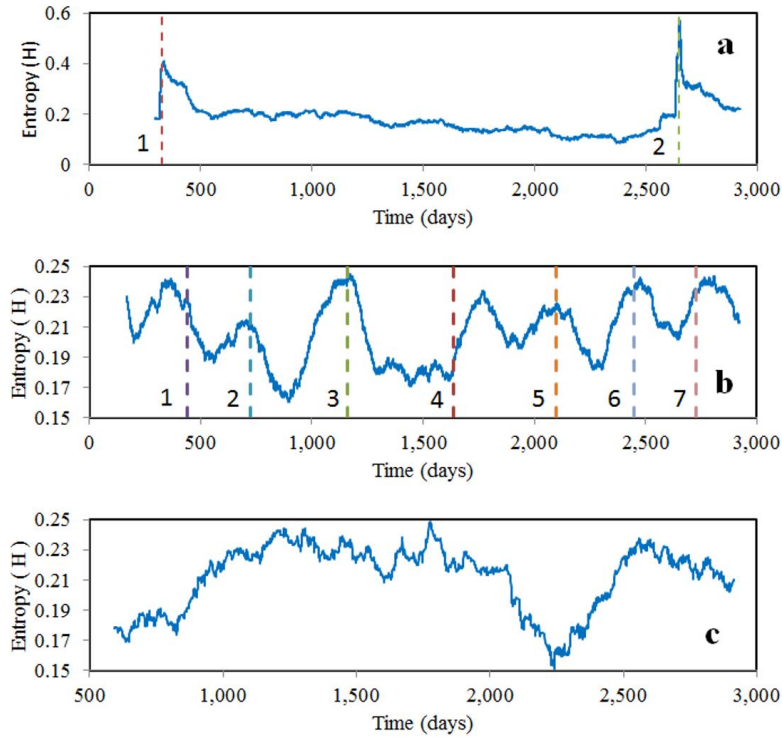

**Figure 8.** Time series of Shannon entropy,  $H$ , within different depth intervals. (a) Zone A (earthquakes with depths of 0–80 km), (b) zone B (80–160 km), and (c) zone C (> 160 km). The relative change in entropy in zone A is  $\sim 0.5$  units compared with 0.09 units in zones B and C. Lines 1 and 2 in (a) correspond to the 2007  $M_W$  7.8 Tocopilla earthquake and  $M_W$  8.1 Iquique earthquake, respectively; lines 1 to 7 in (b) correspond to the  $M_W$  6.5 March 2008 earthquake, clusters of earthquakes with magnitudes ranging from 5.8 to 6.0 from December 2008 to March 2009, the 2010  $M_W$  6.6 Calama earthquake, the 2011  $M_W$  6.8 Calama earthquake, the 2012  $M_W$  5.9 earthquake, clusters of earthquakes with magnitudes ranging from 5.9 to 6.2 from July 2013 to January 2014, and the two 2014  $M_W$  6.2 earthquakes.

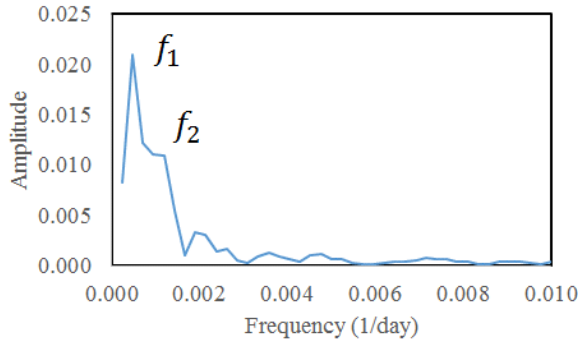

**Figure 9.** Spectrum for the entropic signal of zone B (80–160 km). The two peak amplitudes have frequencies of  $f_1 = 0.00048 \text{ day}^{-1}$  and  $f_2 = 0.00119 \text{ days}^{-1}$ , corresponding to periods of  $\sim 2,100$  and 840 days, respectively.

### 5 Discussion and conclusions

280 It is widely accepted that the seismic cycle (or “seismic system”) comprises six main stages (Figure 10) (Derode et al., 2021; Akopian and Kocharian, 2014). The stages are: (1) Over decades or years, small and medium asperities break continuously, resulting in a uniform rate of seismicity. (2) Asperities become locked, resulting in stress accumulation and decreasing seismic activity. (3) Weeks or days before a mainshock, important asperities progressively break along some sections (i.e., the foreshock stage).  
 285 (4) Over a scale of hours, accumulated stresses overcome friction and blockages in the main asperities, causing the largest magnitude earthquake of the cycle. (5) Stress relaxation occurs after the mainshock and is characterised by numerous aftershocks of smaller magnitude over several weeks or months; this ceases when new asperities become locked. (6) Finally, the system returns to the initial, long-term, state.  
 290

In this paper, we have visualized that this mechanical description of the seismic cycle has an energetic analogy in terms of statistical physics and the Second Law of Thermodynamics. As argued in detail by De Santis *et al.* (2019), an earthquake can be considered as a phase transition, where continuous reorganization of stresses and forces reflects an evolution from equilibrium to non-equilibrium states. Therefore, entropy, which measures the number of accessible states for the present conditions of the systems, can be used as an indicator of the evolution of the system (e.g., (Telesca *et al.*, 2004, Vogel *et al.*, 2020). Stages 1–3 correspond to increasing stresses and the accumulation of seismic energy. During this inter-seismic period, the magnitudes of earthquakes are relatively uniform (or ‘ordered’) and entropy is relatively low. When a large earthquake occurs (stage 4), the rupture process triggers earthquakes with magnitudes of all sizes in a chaotic way, evolving to new conditions reaching a wider range of microstates in a disordered way, and the entropy increases. Finally, during the post-seismic state (stages 5 and 6), the system progressively recovers conditions similar to the initial ones.  
 295  
 300

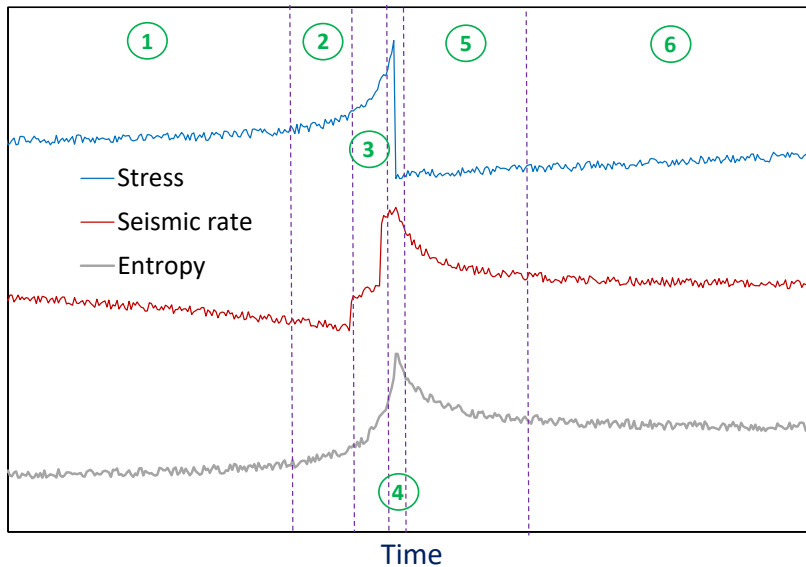

**Figure 10.** Seismic cycle from a mechanical perspective (i.e., stresses and seismic rate, which are shown in blue and red, respectively) and from a thermodynamic perspective (i.e., entropy,  $H$ , which is shown in grey). (1) Stage 1, the interseismic period, is characterised by approximately constant stress, seismic rate, and  $H$ . (2) Stage 2, the accumulation period, is characterised by modest increases in stress and  $H$ , but a modest decrease in seismic rate. (3) Stage 3, the foreshocks period, is characterised by increasing stress, seismic rate, and  $H$ . (4) Stage 4, the coseismic period, is characterised by an abrupt decrease in stress, but increases in the seismic rate and  $H$ . (5) Stage 5, the postseismic and aftershock period, is characterised by decreasing stress (i.e., relaxation), seismic rate, and  $H$  (towards the initial value). (6) Stage 6, during which the seismic cycle starts again.

305

Increasing entropy,  $H$ , from a thermodynamic perspective, is associated with an irreversible transition from one state to another on both small (Scholz, 1968) and large (e.g., Parsons *et al.*, 2008) scales. Using a high-quality catalogue of seismicity in northern Chile, made possible owing to the IPOC network, we confirmed a strong temporal correlation between entropy and the occurrence of earthquakes. Using the entropy value, we could identify all earthquakes with magnitudes of  $> 6.5$  in the catalogue. (i.e., seven events from 2007 to 2014, with magnitudes ranging from 6.6 to 8.1)

310

However, it is important to note that changes in entropy are detected by analysing the entire catalogue; that is, to detect a change in entropy associated with any event, data from both before and after the event must be analysed. At present, this limits the use of this method for seismic prediction. Further study is needed to determine a robust approach for predicting how a time series will continue without prior knowledge; that is, to determine threshold entropy values and trends that can be used to predict a significant event in the immediate future. To achieve this, an absolute scale of entropy will be necessary.

315

320 Earthquakes in zone A (0–80 km depth) tend to be tectonic in origin and have higher  
magnitudes than those in zones B and C (i.e., intermediate and deep earthquakes); as such,  
they are of most concern from a risk management perspective. Our results show that the  
entropy changes associated with such events are much stronger when only data from this  
depth interval is considered; variations are of the order of one hundredth in zones B and  
325 C, but several tenths in zone A.

*Data availability.* The data are public and available at <https://www.ipoc-network.org/data/> and in *Sippl et al. (2018)* available at <http://doi.org/10.5880/GFZ.4.1.2018.001>.

330 *Author contributions.* All authors contributed equally to the design of the methodology,  
discussion, analysis and revisions of the manuscript.

*Competing interests.* The authors declare no competing interests.

*Acknowledgements.* We would like to express our gratitude to the Integrated Plate  
Boundary Observatory Chile (IPOC) for collecting and sharing the data used in this work.

335 *Financial support.* This work was funded partially by the Spanish State Research  
Agency (SRA) under the grant PID2021-124701NB-C21 y C22., partially by the  
FEDER/UAL Project UAL2020-RNM-B1980 and also partially by the research group  
RNM104 of the Junta de Andalucía. The University of Almeria funding for open access  
charge if applicable. EEV was supported by Fondecyt (grant number 1230055) and ANID  
340 through the Center for Development of Nanoscience and Nanotechnology (CEDENNA;  
grant number AFB220001).

## References

Akopian, S. T., Open dissipative seismic systems and ensembles of strong earthquakes:  
345 Energy balance and entropy funnels, *Geophys. J. Int.* 201, 1618–1641 (2015).  
[doi.org/10.1093/gji/ggv096](https://doi.org/10.1093/gji/ggv096).

Akopian, S. Ts., Kocharian, A. N. Critical behaviour of seismic systems and dynamics in  
ensemble of strong earthquakes. *Geophys. J. Int.* 196, 580–599; [doi: 10.1093/gji/ggt398](https://doi.org/10.1093/gji/ggt398)  
(2014).

350 Amorèse, D., Applying a change-point detection method on frequency-magnitude  
distributions, *Bull. Seismol. Soc. Am.* 97, 1742–1749; [doi:10.1785/0120060181](https://doi.org/10.1785/0120060181) (2007).

Ben-Naim, A., Entropy, Shannon’s measure of information and Boltzmann’s H- theorem.  
*Entropy* 2017, 19:48. [doi: 10.3390/e19020048](https://doi.org/10.3390/e19020048).

Ben-Naim, A., Entropy and time. *Entropy* 2020, 22:430. [doi: 10.3390/e22040430](https://doi.org/10.3390/e22040430).

- 355 Cao, A. M., Gao, S. S., Temporal variations of seismic b-values beneath northeastern Japan island arc. *Geophys. Res. Lett.* 29(9), 1334; doi:10.1029/2001GL013775 (2002).
- Cesca, S., Grigoli, F., Heimann, S., Dahm, T., Kriegerowski, M., Sobiesiak, M., Tassara, C. Olcay, M., The Mw 8.1 2014 Iquique, Chile, seismic sequence: a tale of foreshocks and aftershocks, *Geophys. J. Int.*, 204, 1766–1780 (2016). doi: 10.1093/gji/ggv544.
- 360 Clausius, R., *Mechanical theory of heat*. London, UK: John van Voorst; 1865.
- D'Alessandro, A., Luzio, D., D'Anna, G. & Mangano, G., Seismic Network Evaluation through Simulation: An Application to the Italian National Seismic Network, *Bull. Seismol. Soc. Am.* 101, 1213–1232; doi: 10.1785/0120100066 (2011).
- 365 Delouis, B., Pardo, M., Legrand, D., Monfret, T., The MW 7.7 Tocopilla Earthquake of 14 November 2007 at the Southern Edge of the Northern Chile Seismic Gap: Rupture in the Deep Part of the Coupled Plate Interface, *Bull. Seismol. Soc. Am.* 99, (1) 87–94; doi:10.1785/0120080192 (2009).
- 370 Derode, B., Madariaga, R., Campos, J., Seismic rate variations prior to the 2010 Maule, Chile MW 8.8 giant megathrust earthquake, *Sci Rep* 11, 2705. doi.org/10.1038/s41598-021-82152-0 (2021).
- De Santis, A., Cianchini, G., Favali, P., Beranzoli, L. & Boschi, E., The Gutenberg-Richter Law and Entropy of Earthquakes: Two Case Studies in Central Italy, *Bull. Seism. Soc. Am.* 101, 1386–1395; doi: 10.1785/0120090390 (2011).
- 375 De Santis, A., Abbattista, C., Alfonsi, L., Amoroso, L., Campuzano, S., Carbone, M., Cesaroni, C., Cianchini, G., De Franceschi, G., De Santis, A., Di Giovambattista, R., Marchetti, D., Martino, L., Perrone, L., Piscini, A., Rainone, M., Soldani, M., Spogli, L., Santoro, F., “Geosystemics View of Earthquakes”, *Entropy* 21, 412–442 (2019). doi.org/10.3390/e21040412.
- 380 Feng, L., Luo, G., The relationship between seismic frequency and magnitude as based on the Maximum Entropy Principle, *Soft Comput*, 2009, 13:979–83. doi: 10.1007/s00500-008-0340-x.
- Gutenberg, B., and Richter, C. F., “Frequency of earthquakes in California”, *Bull. Seismol. Soc. Am.*, 34, 185–188, 1944.
- 385 Khordad, R., Rastegar Sedehi, H.R., Sharifzadeh, M., Susceptibility, entropy and specific heat of quantum rings in monolayer graphene: comparison between different entropy formalisms, *Journal of Computational Electronics* (2022) 21:422–430. doi.org/10.1007/s10825-022-01857-1.
- 390 Majewski, E., *Thermodynamics of chaos and fractals applied: evolution of the earth and phase transformations*. In: Teisseyre R, Majewski E, editors. *Earthquake thermodynamics and phase transformations in the Earth’s interior*. Academic Press, 2001, p. 25–78.

- Majewski, E., Teisseyre, R., Earthquake thermodynamics. *Tectonophysics* 1997, 277:219–33. doi: 10.1016/S0 040-1951(97)0 0 088-7.
- Michas, G., Vallianatos, F., Sammonds, P., Non-extensivity and long-range correlations in the earthquake activity at the west Corinth rift (Greece). *Nonlinear Process Geophys* 395 2013, 20:713–24. dx.doi.org/10.5194/npg-20-713-2013.
- Nikulov, A., The Law of Entropy Increase and the Meissner Effect. *Entropy* 2022, 24, 83. doi.org/10.3390/e24010083.
- Ogata, Y., Katsura, K., Analysis of temporal and spatial heterogeneity of magnitude frequency distribution inferred from earthquake catalogues, *Geophys. J. Int.* 3(113), 727–400 738; doi: 10.1111/j.1365-246X.1993.tb04663.x (1993).
- Papadakis, G., Vallianatos, F., Sammonds, P., A nonextensive statistical physics analysis of the 1995 Kobe, Japan earthquake. *Pure Appl. Geophys* 2015, 172:1923–31. dx.doi.org/10.1007/s00024-014-0876-x.
- Parsons, T., Ji, C., Kirby, E., Stress changes from the 2008 Wenchuan earthquake and increased hazard in the Sichuan basin, *Nature* 454, 509–510; doi: 10.1038/nature07177 405 (2008).
- Pasten, D., Saravia, G., Vogel, E., Posadas, A., Information theory and earthquakes: depth propagation seismicity in northern Chile. *Chaos, Solitons and Fractals. Nonlinear Science, and Nonequilibrium and Complex Phenomena.* 165, 2, 2022, 112874. 410 doi.org/10.1016/j.chaos.2022.112874.
- Posadas, A., Sotolongo-Costa, O., Non-extensive entropy and fragment–asperity interaction model for earthquakes, *Communications in Nonlinear Science and Numerical Simulation*, 117, 2023, 106906. doi.org/10.1016/j.cnsns.2022.106906.
- Posadas, A., Morales, J., Ibáñez, J., Posadas, A., Shaking earth: Non-linear seismic processes and the second law of thermodynamics: A case study from Canterbury (New Zealand) earthquakes, *Chaos, Solitons and Fractals. Nonlinear Science, and Nonequilibrium and Complex Phenomena*, 151, 2022. 415 doi.org/10.1016/j.chaos.2021.111243.
- Rastegar Sedehi, H.R., Bazrafshan, A., Khordad, R., Thermal properties of quantum rings in monolayer and bilayer graphene, *Solid State Communications*, 353 (2022) 114853. 420 doi.org/10.1016/j.ssc.2022.114853.
- Rundle, J.B., Turcotte, D.L., Shcherbakov, R., Klein, W., Sammis, C., Statistical physics approach to understanding the multiscale dynamics of earthquake fault systems. *Rev Geophys* 2003, 41:1019–49. doi:10.1029/2003RG000135.
- Rydele, P. A., Sacks, I. S., Testing the completeness of earthquake catalogs and the hypothesis of self-similarity, *Nature* 337, 251–253; doi: 10.1038/337251a0 (1989). 425

- Sarlis, N. V., Skordas, E. S., Varotsos, P. A., A remarkable change of the entropy of seismicity in natural time under time reversal before the super-giant M9 Tohoku earthquake on 11 March 2011, *Europhys. Lett.* 124, 29001–29008 (2018). doi: 10.1209/0295-5075/124/29001
- 430
- Shannon, C. E., The mathematical theory of communication, *Bell Syst. Tech. J.* 27, 379–423 (1948).
- Shannon, C. E., Weaver, W., *The Mathematical Theory of Communication* (The Board of Trustees of the University of Illinois, 1949).
- 435
- Scholz, C. H. The frequency–magnitude relation of microfracturing in rock and its relation to earthquakes. *Bull. Seismol. Soc. Am.* 58, 399–415; doi: 10.1785/BSSA0580010399 (1968).
- Sippl, C., Schurr, B., Asch, G., Kummerow, J., Seismicity structure of the northern Chile forearc from >100,000 double-difference relocated hypocenters, *J. Geophys. Res. Solid Earth* 123, 4063–4087; doi: 10.1002/2017JB015384 (2018).
- 440
- Sornette D , Werner MJ . Statistical physics approaches to seismicity. In: Mey- ers RA, editor. *Encyclopedia of complexity and systems science*. Springer; 2009. p. 7872–91. doi: 10.1007/978-0-387-30440-3\_467.
- Telesca, L., Lapenna, V. & Lovallo, M. Information entropy analysis of Umbria-Marche region (central Italy). *Nat. Hazards Earth Syst. Sci.* 4, 691–695; 10.5194/nhess-4-691-2004 (2004).
- 445
- Telesca, L., Thai, A.T., Lovallo, M., Cao, D.T., Nguyen, L.M., Shannon Entropy Analysis of Reservoir-Triggered Seismicity at Song Tranh 2 Hydropower Plant, Vietnam. *Appl. Sci.* 2022, 12, 8873. doi.org/10.3390/app12178873.
- 450
- L. Truffet, Shannon Entropy Reinterpreted, *Reports on Mathematical Physics*, 81, 3, 2018, 303-319, [https://doi.org/10.1016/S0034-4877\(18\)30050-8](https://doi.org/10.1016/S0034-4877(18)30050-8).
- Tsallis, C., Possible generalization of Boltzmann-Gibbs statistics, *J Stat Phys* 1988; 52:479. doi.org/10.1007/BF01016429 .
- 455
- Utsu, T., A method for determining the value of b in a formula  $\log N = a - bM$  showing the magnitude-frequency relation for earthquakes, *Geophys. Bull. Hokkaido Univ. Jpn.* 13, 99–103 (1965).
- Utsu T., Representation and Analysis of the Earthquake Size Distribution: A Historical Review and Some New Approaches, *Pure Appl. Geophys.* 155, 509–535; doi: 10.1007/s000240050276 (1999).
- 460
- Vallianatos, F., Michas, G., Papadakis, G., A description of seismicity based on non-extensive statistical physics: a review. In: D’Amico S, editor. *Earthquakes and their*



- impact on society. Cham: Springer Natural Hazards; 2015, p. 1–41.  
dx.doi.org/10.1007/978-3-319-21753-6.
- 465 Vallianatos, F., Papadakis, G., Michas, G., Generalized statistical mechanics approaches  
to earthquakes and tectonics, Proc R Soc Lond Ser A Math Phys Eng Sci 2016;  
472:20160497. <http://dx.doi.org/10.1098/rspa.2016.0497>.
- Vallianatos, F., Michas, G., Papadakis, G., Nonextensive statistical seismology: An  
overview. In: Chelidze T, Vallianatos F, Telesca L, editors. Complexity of seismic time  
series. Complexity of seismic time series: Measurement and application, Elsevier; 2018,  
470 p. 25–59. dx.doi.org/10.1016/B978-0-12-813138-1.00002-X.
- Vargas, C.A., Flores-Márquez, E.L., Ramírez-Rojas, A., Telesca, L., Analysis of natural  
time domain entropy fluctuations of synthetic seismicity generated by a simple stick–slip  
system with asperities, Physica A: Statistical Mechanics and its Applications, 419, 2015,  
23-28. doi.org/10.1016/j.physa.2014.10.037.
- 475 Varotsos, P. A., Sarlis, N. V., and Skordas, E. S., “Scale-specific order parameter  
fluctuations of seismicity in natural time before mainshocks,” Europhys. Lett. 96, 59002,  
2011. doi 10.1209/0295-5075/96/59002
- Varotsos, P.A.; Sarlis, N.V.; Skordas, E.S. Order Parameter and Entropy of Seismicity in  
Natural Time before Major Earthquakes: Recent Results. Geosciences 2022, 12, 225.  
480 doi.org/10.3390/geosciences12060225.
- Vogel, E.E., Brevis, F.G., Pastén, D., Muñoz, V., Miranda, R.A., Chian, A., Measuring  
the seismic risk along the Nazca-South American subduction front: Shannon entropy and  
mutability. Nat. Hazards Earth Syst. Sci. 20, 2943–2960. doi.org/10.5194/nhess-20-2943-  
2020.
- 485 Wiemer, S, Wyss, M., Minimum magnitude of complete reporting in earthquake catalogs:  
examples from Alaska, the Western United States, and Japan, Bull. Seismol. Soc. Am.  
90, 859–869; doi: 10.1785/0119990114 (2000).
- Zúñiga, F., Wyss, M., Inadvertent changes in magnitude reported in earthquake catalogs:  
Their evaluation through b-value estimates, Bull. Seismol. Soc. Am. 85, 1858–1866;  
490 doi:10.1785/BSSA0850061858 (1995).
- Zupanovic, P., Domagoj, K., Relation between Boltzmann and Gibbs entropy and  
example with multinomial distribution, J. Phys. Commun. 2018, 2:045002. doi:  
10.1088/2399-6528/aab7e1.
